# Supplementary material for: Material, psychosocial and sociodemographic determinants are associated with positive mental health in Europe: a cross-sectional study
Source: PubMed Central journal article supplement — BMJ Open. 2014 May 28;4(5):e005095. doi: 10.1136/bmjopen-2014-005095 (PMC4039806; doi:10.1136/bmjopen-2014-005095), 2014-05-28
Supplement: bmjopen-2014-005095.draft_revisions.pdf [file bmjopen-2014-005095.draft_revisions.pdf]

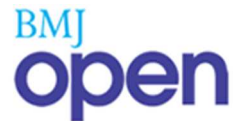

**Material, psychosocial, and socio-demographic determinants of positive mental health in 34 European countries**

|                                 |                                                                                                                                                                                                                                                                                                                                                                   |
|---------------------------------|-------------------------------------------------------------------------------------------------------------------------------------------------------------------------------------------------------------------------------------------------------------------------------------------------------------------------------------------------------------------|
| Journal:                        | <i>BMJ Open</i>                                                                                                                                                                                                                                                                                                                                                   |
| Manuscript ID:                  | bmjopen-2014-005095                                                                                                                                                                                                                                                                                                                                               |
| Article Type:                   | Research                                                                                                                                                                                                                                                                                                                                                          |
| Date Submitted by the Author:   | 20-Feb-2014                                                                                                                                                                                                                                                                                                                                                       |
| Complete List of Authors:       | Dreger, Stefanie; University of Bremen; Institute for Public Health and Nursing Research, Dept. 5 Social Epidemiology<br>Buck, Christoph; Leibniz Institute for Prevention Research and Epidemiology – BIPS, Biometry and Data Management<br>Bolte, Gabriele; University of Bremen; Institute for Public Health and Nursing Research, Dept. 5 Social Epidemiology |
| <b>Primary Subject Heading</b>: | Epidemiology                                                                                                                                                                                                                                                                                                                                                      |
| Secondary Subject Heading:      | Public health, Mental health                                                                                                                                                                                                                                                                                                                                      |
| Keywords:                       | EPIDEMIOLOGY, MENTAL HEALTH, PUBLIC HEALTH                                                                                                                                                                                                                                                                                                                        |
|                                 |                                                                                                                                                                                                                                                                                                                                                                   |

SCHOLARONE™  
Manuscripts

1  
2  
3 **Material, psychosocial, and socio-demographic determinants of positive**  
4 **mental health in 34 European countries**  
5  
6  
7  
8  
9  
10  
11  
12

13 Corresponding author:

14 Stefanie Dreger

15 Department of Social Epidemiology

16 Institute for Public Health and Nursing Research

17 University of Bremen

18 Grazer Straße 4

19 28359 Bremen

20 Tel.: 0421/218-68822

21 Fax: 0421/218-9868822

22 E-Mail: stefanie.dreger@uni-bremen.de  
23  
24  
25  
26  
27

28 Authors:

29 Stefanie Dreger

30 Department of Social Epidemiology

31 Institute for Public Health and Nursing Research

32 University of Bremen

33 Bremen

34 Germany  
35  
36  
37

38 Christoph Buck

39 Leibniz Institute for Prevention Research and Epidemiology – BIPS

40 Bremen

41 Germany  
42  
43

44 Gabriele Bolte

45 Department of Social Epidemiology

46 Institute for Public Health and Nursing Research

47 University of Bremen

48 Bremen

49 Germany  
50  
51  
52  
53

54 Keywords: Positive Mental Health, determinants, Europe, mental well-being, mental health  
55  
56

57 Word count: 2931  
58  
59  
60

**ABSTRACT**

**Background** Most studies in the field of mental health focus on mental distress and diseases. Little is known on determinants of the new concept positive mental health. Poor positive mental health is a risk factor for depression and increased mortality.

**Methods** Based on the third wave of the European Quality of Life Survey (2011/2012) covering 21066 men and 22569 women in 34 countries, the association between positive mental health and socio-demographic, psychosocial and material factors was assessed. The World Health Organization 5 – Mental Wellbeing Index was used as measure of positive mental health. Poor positive mental health was defined as values below the 25% percentile of the index. Multilevel logistic regression analyses were performed.

**Results** The prevalence of poor positive mental health was 30% in women and 24% in men. Higher age, lower educational status, not working, living alone, practicing religion rarely or never, low social support, low levels of trust, high social exclusion, and various material factors were associated with poor positive mental health in both genders. For women, absence of children was an additional risk factor.

**Conclusion** Material, as well as psychosocial and socio-demographic factors were independently associated with positive mental health. This study gives a first overview on determinants of positive mental health on a European level and could be used as a first basis for preventive policies in the field of positive mental health in Europe.

**Strengths and limitations of this study**

- Large dataset with comparable data across Europe, allowed us to study each gender separately and comparability of data between 34 European countries enabled us to give an overall view of determinants of PMH among people in Europe
- Face-to face interviews were conducted
- Relies on self-reported data
- No causal interpretation possible, because of cross sectional nature of study
- Response rate of EQLS was lower than aspired

**BACKGROUND**

Mental Health and its determinants have been examined in numerous studies. However, the focus has mainly been on mental ill-health. Yet, good mental health is more than the absence of disorder and disease. According to the definition of the WHO mental health is a "state of well-being in which the individual realizes his skills, cope with the normal stresses of life, can work productively and fruitfully, and is able to make a contribution to his community".[1] The positive dimension of mental health is stressed in WHO's definition of health as stated in its constitution: "Health is a state of complete physical, mental and social well-being and not merely the absence of disease or infirmity."[2] Studies provide empirical support that mental health consists of two dimensions: mental ill-health and positive mental health (PMH) in terms of mental well-being.[3, 4] These two concepts are not two opposite sides of one continuum but rather constitute distinct, though

1  
2  
3 correlated, axes with independent determinants.[3, 5] Keyes' two-continua model demonstrates this  
4 way of looking at mental illness and PMH.[5] The one continuum reflects the presence or absence of  
5 mental illness, and overlaps in part with the other continuum, which represents the presence or  
6 absence of PMH.[6]

7  
8  
9 The study of PMH is relatively young and there is still discussion on a common definition of PMH.[7]  
10 Nevertheless there is agreement that a multi-dimensional measure is needed to accurately assess  
11 PMH.[4, 8, 9] PMH is not only a benefit in itself, but poor PMH in terms of low levels on the  
12 continuum of positive mental health has been described as a risk factor for depression [10, 11] and  
13 absence of PMH has been associated with an increased risk of mortality.[12] Positive mental health  
14 can be influenced by socio-demographic, psychosocial or material factors.[13-16] Epidemiological  
15 studies investigating PMH are rare. Those studies that do focus on PMH investigated only few factors  
16 and looked at one country or at a very limited number of countries. To our knowledge no study exists  
17 that analyses a broad set of determinants of PMH in several countries simultaneously. The objective  
18 of our study was therefore to examine the association between socio-demographic, psychosocial,  
19 and material factors and PMH in the whole region of Europe taking gender differences into account.  
20  
21  
22  
23  
24  
25  
26  
27  
28

## 29 **METHODS**

### 30 **Sample**

31 This study is based on the European Quality of life Survey (EQLS),[17] which is run every 4 years by  
32 the European Foundation for the improvement of living and working conditions. The third wave of  
33 the EQLS, which was carried out in 2011/2012 included people aged 18 years and older from 34  
34 countries (EU-27, Croatia, Iceland, Montenegro, Former Yugoslav Republic of Macedonia, Serbia,  
35 Turkey, Kosovo). In all countries, data was collected via face-to-face interviews at respondents'  
36 home that were selected by multistage random sampling. The overall response rate was 41%. A more  
37 detailed description of the EQLS 2012 can be found elsewhere.[18]  
38  
39  
40  
41  
42  
43  
44

### 45 **Positive Mental Health**

46 Positive Mental Health was measured with the World Health Organization 5 – Mental Wellbeing  
47 Index (WHO-5).[19] It is calculated from responses to five items: a) I have felt cheerful and in good  
48 spirits; b) I have felt calm and relaxed; c) I have felt active and vigorous; d) I woke up feeling fresh  
49 and rested; e) my daily life has been filled with things that interest me. The degree to which the  
50 aforesaid positive feelings were present in the last two weeks is scored on a 6-point Likert scale  
51 ranging from 0 'at no time' to 5 'all of the time'. The scores to these five questions can amount to a  
52 maximum of 25, which is then multiplied by 4 to get to a maximum of 100, in which 0 corresponds  
53 with worst thinkable well-being and 100 equals best thinkable well-being. The WHO-5 is considered a  
54  
55  
56  
57  
58  
59  
60

1  
2  
3 valid instrument to evaluate PMH in population based studies.[20] An average score of the index was  
4 calculated for the study population and those with values below the 25% percentile were considered  
5 to have poor PMH.  
6  
7

### 9 **Potential determinants of positive mental health**

10 Three groups of determinants of PMH were studied: socio-demographic, psychosocial, and material  
11 factors. This classification of determinants was inspired by studies that have used this classification in  
12 the field of self-rated health.[21, 22]  
13

14 *Socio-demographic factors were:* age, educational level (categorized into three groups according to  
15 the International Standard Classification of Education), urbanization level (living in rural/urban area)  
16 and citizenship (European/ non-European). All these variables were categorical variables. Since  
17 potential risk factors might have different meaning for men and women, gender was not considered  
18 as potential risk factor but as a structural variable and thus potential effect modifier. Therefore, all  
19 analyses were stratified by gender.[23]  
20

21 *Psychosocial factors were:* Marital status, presence of children, social support (help from  
22 family/friends/neighbour/service provider in case of need for help around the house, advice, looking  
23 for a job, feeling depressed, financial problems; five items), social network (frequency of contact with  
24 family/friends/neighbours; eight items), political participation (attended a meeting of a trade  
25 union/political party/political action group, attended protest or demonstration, signed a petition,  
26 contacted a politician/public official; four items), trust (in parliament/legal  
27 system/press/police/government/local authorities; 6 items), religion (frequency of attending  
28 religious services), social exclusion (feelings of lack of recognition/confusion in  
29 life/exclusion/inferiority; four items). Marital status, presence of children, and religion were  
30 categorical variables. For social network, social support, political participation, trust, and social  
31 exclusion, average scores were calculated and the median was used as cut-off point for the creation  
32 of dichotomized variables.  
33

34 *Material factors were:* household tenure, housing problems (shortage of space, rot in windows/  
35 doors/floors, damp/leaks in walls/roof, lack of bath or shower/indoor flushing toilet, place to sit  
36 outside; six items), neighbourhood problems (noise/air pollution/quality of drinking  
37 water/crime/violence/vandalism/litter/ traffic; six items), material deprivation (not able to afford the  
38 following amenities/activities: heating/vacation/furniture/meal with meat, chicken, fish every second  
39 day/new clothes/having friends and family for drinks or meals at least once a month; six items),  
40 financial problems (problems paying bills for rent/informal and consumer loans/electricity; four  
41 items), quality of public services (health services/education system/public transport/long term  
42 care/child care services/state pension system/social housing; six items).  
43  
44

Household tenure was a categorical variable. Housing problems, neighbourhood problems, financial problems, material deprivation, and quality of public services were dichotomized at the median of the average score of the items.

### Statistical methods

First the distribution of socio-demographic, psychosocial, and material factors were described separately for men and women, and the percentage of poor PMH was reported for each category.

The association between the potential determinants and PMH was examined using multilevel logistic regression analysis. Three separate models for women and men were computed to study the association of the groups of determinants (socio-demographic, psychosocial, and material factors) and PMH independently (model 1-3). After that, all variables that were significant at  $\alpha=0.05$  for at least one gender were included in the final model (model 4). Multilevel models are particularly appropriate for research designs where data for participants are organized on more than one level to take into account the between- and within variability of these hierarchically organized data (individuals, region, country).[24] Hence, individual determinants were introduced as fixed effects, and country and region were used as random effects in the multilevel analysis taking into account three levels of data: individuals clustered in 330 regions, which are clustered in 34 countries.

Although interrelations between factors were found, no collinearity was detected, as the variance inflation factor was never greater than 1.9. Variance inflation factors greater than 2.5 may be problematic.[25]

Since determinants of PMH have only rarely been studied, no literature on potential interactions was available. However, gender differences have been suggested in this context [14, 26] and men and women have different life circumstances. Therefore, we studied men and women separately.

All statistical analyses were conducted using SAS statistical software version 9. The product of the design weight and post-stratification weight was used as weighting factor as recommended in the EQLS guidelines. In sensitivity analyses multilevel logistic regressions were conducted without weights, and with weights. The parameter estimates were substantially similar. Therefore the unweighted Odds Ratios are presented, as advised by Winship and Radbill,[27] because they are more efficient and the standard error is correct.

### RESULTS

Overall, 21066 men and 22569 women participated in the study and were considered for the present analysis. Table 1 shows the distribution of socio-demographic, psychosocial, and material factors and the percentage of people with poor PMH in each category for men and women separately. Overall, the proportion of poor PMH was higher in women than in men (30% vs 24%). Furthermore, women

1  
2  
3 in the study sample were slightly older, and more often had a low education, did not work, had  
4 children, practiced religion, did not engage in political participation, were affected by material  
5 deprivation. The prevalence of poor mental health ranged from 9.50% in Iceland to 36.13% in Serbia  
6 among men and from 15.25% in Finland to 45.16% in Serbia among women (results not shown).  
7  
8  
9  
10  
11  
12  
13  
14  
15  
16  
17  
18  
19  
20  
21  
22  
23  
24  
25  
26  
27  
28  
29  
30  
31  
32  
33  
34  
35  
36  
37  
38  
39  
40  
41  
42  
43  
44  
45  
46  
47  
48  
49  
50  
51  
52  
53  
54  
55  
56  
57  
58  
59  
60

For peer review only

Table 1 Percentages of men and women with poor positive mental health by socio-demographic, psychosocial, and material factors\*

|                                  | Men   |    |            | Women |    |            |
|----------------------------------|-------|----|------------|-------|----|------------|
|                                  | N     | %  | % poor PMH | N     | %  | % poor PMH |
| PMH                              |       |    |            |       |    |            |
| Good                             | 15997 | 76 |            | 15751 | 70 |            |
| Poor                             | 5069  | 24 |            | 6818  | 30 |            |
| <b>Socio-demographic factors</b> |       |    |            |       |    |            |
| Age (Years)                      |       |    |            |       |    |            |
| 18-24                            | 2707  | 13 | 16         | 2539  | 11 | 22         |
| 25-34                            | 3919  | 19 | 21         | 3742  | 17 | 24         |
| 35-49                            | 5847  | 28 | 25         | 5925  | 26 | 29         |
| 50-64                            | 4932  | 23 | 27         | 5227  | 23 | 32         |
| 65+                              | 3662  | 17 | 28         | 5136  | 23 | 38         |
| Education                        |       |    |            |       |    |            |
| Primary or less                  | 1971  | 9  | 36         | 3090  | 14 | 44         |
| Secondary                        | 13945 | 67 | 24         | 13983 | 62 | 30         |
| Tertiary                         | 5004  | 24 | 19         | 5366  | 24 | 22         |
| Working                          |       |    |            |       |    |            |
| Yes                              | 11494 | 55 | 20         | 8955  | 40 | 24         |
| no                               | 9573  | 45 | 29         | 13614 | 60 | 34         |
| Urbanization level               |       |    |            |       |    |            |
| Countryside or village           | 9774  | 47 | 25         | 10325 | 46 | 31         |
| Town or city                     | 11247 | 54 | 24         | 12187 | 54 | 30         |
| Citizenship                      |       |    |            |       |    |            |
| European                         | 20509 | 98 | 24         | 22094 | 98 | 30         |
| Non-European                     | 470   | 2  | 25         | 409   | 2  | 30         |
| <b>Psychosocial factors</b>      |       |    |            |       |    |            |
| Marital status                   |       |    |            |       |    |            |
| living with partner              | 11990 | 57 | 24         | 11678 | 52 | 28         |
| living alone                     | 8926  | 43 | 24         | 10749 | 48 | 32         |
| Children                         |       |    |            |       |    |            |
| Present                          | 13065 | 62 | 26         | 16272 | 72 | 33         |
| Absent                           | 8001  | 38 | 22         | 6297  | 28 | 24         |
| Religion                         |       |    |            |       |    |            |
| Practicing often                 | 4831  | 23 | 25         | 6854  | 31 | 31         |
| rarely                           | 6875  | 33 | 23         | 7637  | 34 | 29         |
| never                            | 9255  | 44 | 24         | 7976  | 36 | 31         |
| Social network                   |       |    |            |       |    |            |
| high                             | 4097  | 19 | 24         | 4563  | 20 | 31         |
| low                              | 16969 | 81 | 24         | 18007 | 80 | 30         |
| Social support                   |       |    |            |       |    |            |
| high                             | 10070 | 48 | 21         | 10467 | 46 | 26         |
| Low                              | 10996 | 52 | 27         | 12102 | 54 | 34         |
| Political participation          |       |    |            |       |    |            |
| yes                              | 5410  | 26 | 21         | 4818  | 22 | 25         |
| no                               | 15268 | 74 | 25         | 17380 | 78 | 32         |
| Level of trust                   |       |    |            |       |    |            |
| high                             | 10359 | 49 | 18         | 10947 | 49 | 24         |
| low                              | 10708 | 51 | 30         | 11623 | 52 | 36         |
| Social exclusion                 |       |    |            |       |    |            |
| low                              | 7800  | 37 | 16         | 8200  | 36 | 21         |
| high                             | 13266 | 63 | 29         | 14369 | 64 | 35         |
| <b>Material factors</b>          |       |    |            |       |    |            |
| Neighbourhood problems           |       |    |            |       |    |            |
| low                              | 8024  | 38 | 21         | 8547  | 38 | 27         |
| high                             | 13043 | 62 | 26         | 14022 | 62 | 32         |
| Housing problems                 |       |    |            |       |    |            |
| Absent                           | 13381 | 64 | 20         | 13893 | 62 | 25         |
| Present                          | 7499  | 36 | 31         | 8455  | 38 | 39         |
| Household tenure                 |       |    |            |       |    |            |
| tenant                           | 14606 | 75 | 23         | 15997 | 76 | 30         |
| owner                            | 4832  | 25 | 25         | 5059  | 24 | 30         |
| Material deprivation             |       |    |            |       |    |            |
| Absent                           | 9843  | 51 | 14         | 8991  | 43 | 18         |
| Present                          | 9592  | 49 | 33         | 11829 | 57 | 38         |
| Financial problems               |       |    |            |       |    |            |
| no                               | 16207 | 77 | 21         | 17379 | 77 | 27         |
| yes                              | 4859  | 23 | 35         | 5191  | 23 | 41         |
| Quality of public services       |       |    |            |       |    |            |
| good                             | 5699  | 27 | 17         | 6241  | 28 | 21         |
| poor                             | 15367 | 73 | 27         | 16329 | 72 | 34         |

\* product of the design weight and the post-stratification weight applied



**Models 1-3**

Table 2 presents the results for the multilevel logistic regression analyses, with each set of factors being studied separately for men and women. In model 1 (including socio-demographic factors) lower educational level, older age and not working was significantly associated with poor PMH among both genders. Additionally being citizen of a non-European country was associated with poor PMH in women. In model 2 (including socio-demographic and psychosocial factors) living without a partner, practicing religion rarely or never, low social support, low levels of trust, and high levels of social exclusion were significantly associated with poor PMH among both genders, independently of socio-demographic factors. Having no children was additionally associated with poor PMH in women. The strongest effect in model 2 was seen for high social exclusion with an OR of 1.82 (1.68-1.98) for men and 1.80 (1.68-1.92) for women. In model 3 (including socio-demographic factors and material factors) all material factors, except household tenure, were associated with poor PMH among both genders, controlling for socio-demographic characteristics. The highest odds ratio was seen for material deprivation in both genders (OR 2.13 (2.00-2.41) for men and OR 2.17 (2.01-2.35) for women). Urbanization level and social network were not associated with poor PMH in both genders in the respective models, and were therefore not included in model 4.

**Model 4**

In model 4 the strongest associations with poor PMH among both genders were observed for higher age, social exclusion (OR= 1.73 (1.59-1.90) for men and OR=1.69 (1.57-1.81) for women), and material deprivation (OR=1.96 (1.27-1.53) for men and OR=1.93 (1.79-2.08) for women). Moreover, living without a partner, lower education status, not working, practicing religion rarely or never, low social support, social exclusion, and all material factors were significantly associated with poor PMH among both genders. Not having children was only independently associated with poor PMH in women. Being citizen of a non-European country was no longer significant when taking into account all other factors in model 4.

Table 2 Association between socio-demographic, psychosocial, and material factors and positive mental health for men and women

| OR (95% CI)                      | Model 1-3*              |                         | Model 4                 |                         |
|----------------------------------|-------------------------|-------------------------|-------------------------|-------------------------|
|                                  | Men                     | Women                   | Men                     | Women                   |
| <b>Model 1</b>                   |                         |                         |                         |                         |
| <b>Socio-demographic factors</b> |                         |                         |                         |                         |
| Age (Years)                      |                         |                         |                         |                         |
| 18-24                            | 1.00                    | 1.00                    | 1.00                    | 1.00                    |
| 25-34                            | <b>1.78 (1.51-2.08)</b> | <b>1.37 (1.20-1.56)</b> | <b>1.65 (1.37-1.98)</b> | <b>1.27 (1.09-1.50)</b> |
| 35-49                            | <b>2.33 (2.00-2.70)</b> | <b>1.87 (1.65-2.11)</b> | <b>2.26 (1.88-2.71)</b> | <b>1.69 (1.45-1.96)</b> |
| 50-64                            | <b>2.17 (1.88-2.50)</b> | <b>1.87 (1.65-2.11)</b> | <b>2.44 (2.03-2.93)</b> | <b>1.85 (1.59-2.15)</b> |
| 65+                              | <b>1.77 (1.52-2.06)</b> | <b>1.97 (1.74-2.24)</b> | <b>2.47 (2.03-3.01)</b> | <b>2.11 (1.81-2.46)</b> |
| Education                        |                         |                         |                         |                         |
| Primary or less                  | 1.00                    | 1.00                    | 1.00                    | 1.00                    |
| Secondary                        | <b>0.66 (0.58-0.74)</b> | <b>0.68 (0.62-0.74)</b> | <b>0.73 (0.64-0.83)</b> | <b>0.76 (0.69-0.84)</b> |
| Tertiary                         | <b>0.50 (0.43-0.57)</b> | <b>0.47 (0.42-0.53)</b> | <b>0.71 (0.61-0.83)</b> | <b>0.65 (0.58-0.73)</b> |
| Working                          |                         |                         |                         |                         |
| Yes                              | 1.00                    | 1.00                    | 1.00                    | 1.00                    |
| No                               | <b>1.66 (1.52-1.81)</b> | <b>1.23 (1.18-1.37)</b> | <b>1.27 (1.15-1.40)</b> | <b>1.13 (1.05-1.23)</b> |
| Urbanization level               |                         |                         |                         |                         |
| Countryside or village           | 1.00                    | 1.00                    |                         |                         |
| Town or city                     | 1.01 (0.933-1.09)       | 1.01 (0.95-1.07)        |                         |                         |
| Citizenship                      |                         |                         |                         |                         |
| European                         | 1.00                    | 1.00                    | 1.00                    | 1.00                    |
| Non-European                     | 1.22 (0.94-1.56)        | <b>1.31 (1.05-1.63)</b> | 1.01 (0.77-1.33)        | 1.02 (0.81-1.30)        |
| <b>Model 2</b>                   |                         |                         |                         |                         |
| <b>Psychosocial factors</b>      |                         |                         |                         |                         |
| Marital status                   |                         |                         |                         |                         |
| Living with partner              | 1.00                    | 1.00                    | 1.00                    | 1.00                    |
| Living alone                     | <b>1.20 (1.09-1.31)</b> | <b>1.31 (1.23-1.40)</b> | <b>1.84 (1.07-1.30)</b> | <b>1.17 (1.09-1.25)</b> |
| Children                         |                         |                         |                         |                         |
| Present                          | 1.00                    | 1.00                    | 1.00                    | 1.00                    |
| Absent                           | 0.92 (0.86-1.08)        | <b>0.83 (0.76-0.91)</b> | 1.00 (0.89-1.12)        | <b>0.90 (0.82-0.98)</b> |
| Religion                         |                         |                         |                         |                         |
| Practicing often                 | 1.00                    | 1.00                    | 1.00                    | 1.00                    |
| Rarely                           | <b>1.27 (1.15-1.41)</b> | <b>1.27 (1.18-1.38)</b> | <b>1.27 (1.14-1.42)</b> | <b>1.24 (1.14-1.35)</b> |
| Never                            | <b>1.11 (1.00-1.23)</b> | <b>1.09 (1.01-1.17)</b> | <b>1.13 (1.01-1.26)</b> | <b>1.08 (1.00-1.17)</b> |
| Social network                   |                         |                         |                         |                         |
| High                             | 1.00                    | 1.00                    |                         |                         |
| Low                              | 1.03 (0.93-1.13)        | 1.04 (0.96-1.12)        |                         |                         |
| Social support                   |                         |                         |                         |                         |
| High                             | 1.00                    | 1.00                    | 1.00                    | 1.00                    |
| Low                              | <b>1.30 (1.20-1.41)</b> | <b>1.44 (1.35-1.54)</b> | <b>1.20 (1.10-1.31)</b> | <b>1.29 (1.20-1.38)</b> |
| Political participation          |                         |                         |                         |                         |
| Yes                              | 1.00                    | 1.00                    |                         |                         |
| No                               | 0.99 (0.91-1.08)        | 1.03 (0.95-1.11)        |                         |                         |
| Level of trust                   |                         |                         |                         |                         |
| High                             | 1.00                    | 1.00                    | 1.00                    | 1.00                    |
| Low                              | <b>1.66 (1.53-1.79)</b> | <b>1.51 (1.42-1.61)</b> | <b>1.43 (1.31-1.55)</b> | <b>1.32 (1.23-1.41)</b> |
| Social exclusion                 |                         |                         |                         |                         |
| Low                              | 1.00                    | 1.00                    | 1.00                    | 1.00                    |
| High                             | <b>1.82 (1.68-1.98)</b> | <b>1.80 (1.68-1.92)</b> | <b>1.73 (1.59-1.90)</b> | <b>1.69 (1.57-1.81)</b> |
| <b>Model 3</b>                   |                         |                         |                         |                         |
| <b>Material factors</b>          |                         |                         |                         |                         |
| Neighborhood problems            |                         |                         |                         |                         |
| Low                              | 1.00                    | 1.00                    | 1.00                    | 1.00                    |
| High                             | <b>1.16 (1.07-1.27)</b> | <b>1.12 (1.04-1.20)</b> | <b>1.13 (1.04-1.23)</b> | <b>1.07 (1.00-1.15)</b> |
| Housing problems                 |                         |                         |                         |                         |
| Absent                           | 1.00                    | 1.00                    | 1.00                    | 1.00                    |
| Present                          | <b>1.46 (1.34-1.60)</b> | <b>1.58 (1.48-1.69)</b> | <b>1.40 (1.30-1.52)</b> | <b>1.52 (1.43-1.63)</b> |
| Household tenure                 |                         |                         |                         |                         |
| Tenant                           | 1.00                    | 1.00                    |                         |                         |
| Owner                            | 1.00 (0.89-1.11)        | 1.00 (0.91-1.08)        |                         |                         |
| Material deprivation             |                         |                         |                         |                         |
| Absent                           | 1.00                    | 1.00                    | 1.00                    | 1.00                    |
| Present                          | <b>2.19 (2.00-2.41)</b> | <b>2.17 (2.01-2.35)</b> | <b>1.96 (1.78-2.15)</b> | <b>1.93 (1.79-2.08)</b> |
| Financial problems               |                         |                         |                         |                         |
| No                               | 1.00                    | 1.00                    | 1.00                    | 1.00                    |
| Yes                              | <b>1.57 (1.42-1.73)</b> | <b>1.39 (1.29-1.51)</b> | <b>1.50 (1.34-1.63)</b> | <b>1.33 (1.23-1.43)</b> |
| Quality of public services       |                         |                         |                         |                         |
| Good                             | 1.00                    | 1.00                    | 1.00                    | 1.00                    |
| Poor                             | <b>1.54 (1.40-1.70)</b> | <b>1.64 (1.51-1.77)</b> | <b>1.39 (1.27-1.53)</b> | <b>1.51 (1.40-1.63)</b> |

\*Model 2 and 3 have been adjusted for all socio-demographic factors of model 1

## DISCUSSION

This is one of the first studies to examine PMH in a large Europe wide sample and to our knowledge the first to report on a wide range of determinants. We grouped the determinants that have individually been reported in the literature with regard to mental health. Our study found a broad range of risk factors for poor PMH and our results are mainly in line with previous research that showed similar associations in single countries or single correlates, not controlling for other factors. However, most studies so far have looked at mental illness and not at PMH. Other studies covering more positive aspects of mental health used single questions about happiness or life satisfaction. This approach is not the same as the concept of PMH, since it only covers the hedonistic perspective of wellbeing, in the sense of feeling happy.[28]

A large number of associations between socio-demographic, psychosocial, and material risk factors and PMH in citizens from 34 European countries were found in this study. Higher age, lower educational status and not working were associated with poor PMH among both genders. Of the psychosocial factors, practicing religion rarely or never, low social support, low levels of trust, and high social exclusion were associated with poor PMH among both genders. Living alone was associated with PMH in both genders; the OR was higher for men than for women. An association of absence of children and poor PMH was found among women. All material determinants were associated with poor PMH among men and women.

Our results are in line with previous studies reporting that low educational level,[14, 29-31] and not working,[14, 30] are associated with poor mental wellbeing. The results on age and indicators of mental wellbeing are controversial, some studies reporting that older age groups are at higher risk for poor mental wellbeing,[14, 16, 29, 32] in accordance with our results, others finding the opposite.[33-35] Associations between living area and mental wellbeing have been reported, however the direction of this relationship is not clear: living in a rural area [14] and living in a large city [16] have been associated with poor PMH. When classifying living area in two categories - urban or rural - we did not find a significant association between living area and PMH. Living alone,[16, 30, 32] low social support,[13, 14, 16, 31, 36] loneliness,[14] and exclusion [37] have been associated with poor positive mental- or emotional health and a study in Russia found associations between high levels of trust and high emotional health.[37] We found that not or rarely attending religious services was associated with poor PMH. A previous study reported that frequency of prayer is associated with mental wellbeing.[35] There are some studies investigating the associations of material factors and mental illness. Poor economic condition [16] and neighbourhood problems [15, 36] have been associated with poor mental wellbeing or PMH before. However, research on the effect of other material factors on PMH is lacking.

1  
2  
3 In the intermediate models 1-3 age, social exclusion and material deprivation showed the strongest  
4 association with poor PMH among men and women. These three factors also appeared to have the  
5 strongest association with poor PMH in our final model (model 4), examining the effect of all  
6 determinants together. Particularly, all material factors were significantly associated with poor PMH  
7 in the separate as well as in the complete model, taking further socio-demographic and psychosocial  
8 factors into account. This group of determinants has not been studied extensively yet in the context  
9 of PMH but rather with regard to self-rated health [21, 22] or mental illness.[38] The fact that these  
10 factors stayed significant throughout all models is in agreement with the believe that material factors  
11 may have a direct (through biological pathways) or indirect effect (through e.g. behavioural factors)  
12 on health outcomes.[22] We might not have found a significant association of household tenure and  
13 PMH because there are cultural differences between countries in the approaches of buying a house  
14 or living for rent. Hence household tenure might not be an indicator for material prosperity in all  
15 countries.

16  
17  
18  
19  
20  
21  
22  
23  
24 One of the limitations of this study is its cross-sectional nature. When interpreting the relationship  
25 between the determinants, it needs to be kept in mind that no causal interpretation is possible. The  
26 response rate of 41% in the third round of the EQLS was lower than aspired and differed across  
27 countries.[18] It has been argued that non-participants in epidemiological cohort-studies may be  
28 more likely to belong to low social groups and to have poorer health outcomes.[39] This would be a  
29 selection bias and the prevalence of poor PMH as well as the association between some  
30 determinants, especially material determinants, might be underestimated. This study did not take  
31 into account (mediating) behavioural factors (e.g. physical activity), which may play a role in the  
32 association with PMH. Physical activity has a positive effect on PMH [40] and it could be  
33 hypothesized that living in areas with high neighbourhood problems, might hinder leisure time-  
34 physical activity, hence physical activity could be a mediating factor in the association between  
35 material factors and PMH. For future studies it would be highly desirable to also include behavioural  
36 factors. Although the WHO-5 is a validated and relatively short measure of PMH in population  
37 surveys, there are more comprehensive measures to assess this complex construct. Moreover, in this  
38 study the cut-off point for poor PMH has been set at the 25% percentile to look at people that have  
39 low levels of PMH. Using medians or quartiles as cut-off point when no official cut-off points are  
40 available is common practice. However, a standardized cut-off point for the WHO-5 would be  
41 preferable. The study of PMH is relatively young and there is still discussion on a common definition  
42 of PMH and different measurements exist. It will take some years to achieve agreement on the  
43 appropriate measurement and definition of PMH.[7] In this context it would be worthwhile to also  
44 test if instruments are gender sensitive. This study, on the other hand has many strengths. The large  
45 dataset with comparable data across Europe, allowed us to study each gender separately and  
46  
47  
48  
49  
50  
51  
52  
53  
54  
55  
56  
57  
58  
59  
60

1  
2  
3 comparability of data between 34 European countries enabled us to give an overall view of  
4 determinants of PMH among people in Europe. It used the WHO-5 as a validated measure for PMH  
5 and has analysed a broad picture of potential risk factors. Another strength of this study was that  
6 face-to face interviews were conducted.  
7  
8  
9

### 10 **Conclusion**

11 This study showed independent associations between various socio-demographic, psychosocial, and  
12 material determinants and PMH. Our study provides a first overview of the distribution of  
13 determinants and their association with PMH in Europe. Thereby it can be used as a first basis for  
14 confirmatory and more specific analysis on determinants of poor mental health as well as for the  
15 development of preventive programs or policies in this context.  
16  
17  
18  
19  
20  
21  
22  
23  
24  
25  
26  
27  
28  
29  
30  
31  
32  
33  
34  
35  
36  
37  
38  
39  
40  
41  
42  
43  
44  
45  
46  
47  
48  
49  
50  
51  
52  
53  
54  
55  
56  
57  
58  
59  
60

**Acknowledgements:**

Copyright of the original data belongs to the European Foundation for the Improvement of Living and Working Conditions.

The original data creators, depositors, or copyright holders, the funders of the Data Collection and the UK Data Archive bear no responsibility for the further analysis or interpretation of the data of the European Quality of Life Survey.

**Funding** None

**Contributorship Statement:**

SD was in charge of designing, analyzing and writing up for the manuscript.

CB advised on statistical analyses and helped to draft the manuscript.

GB participated in the conceptualization of the analyses and in the revision of the manuscript.

All authors read and approved the final manuscript.

**Competing interests** None

**Data Sharing Statement:** We analysed data of the European Quality of Life Survey (EQLS).

Permission to analyse data of the EQLS can be requested at Eurofond

(<http://www.eurofound.europa.eu/surveys/faq/index.htm>)

## References

- 1 WHO. Strengthening mental health promotion. *Fact sheet no 220*. Geneva 2001.
- 2 Preamble to the Constitution of the World Health Organization as adopted by the International Health Conference NY, 19-22 June, 1946; signed on 22 July 1946 by the representatives of 61 States (Official Records of the World Health Organization, no. 2, p. 100) and entered into force on 7 April 1948.
- 3 Huppert FA, Whittington JE. Evidence for the independence of positive and negative well-being: Implications for quality of life assessment. *Br J Health Psychol* 2003;**8**:107-22.
- 4 Keyes CL. The mental health continuum: from languishing to flourishing in life. *J Health Soc Behav* 2002;**43**:207-22.
- 5 Keyes CLM. Mental illness and/or mental health? Investigating axioms of the complete state model of health. *J Consult Clin Psychol* 2005;**73**:539-48.
- 6 Lammers S. Positive Mental Health: Measurement, relevance and implications. Enschede: University of Twente 2012.
- 7 Huppert FA, So TT. Flourishing Across Europe: Application of a New Conceptual Framework for Defining Well-Being. *Soc Indic Res* 2013;**110**:837-61.
- 8 Ryan RM, Deci EL. On happiness and human potentials: a review of research on hedonic and eudaimonic well-being. *Annu Rev Psychol* 2001;**52**:141-66.
- 9 Tennant R, Hiller L, Fishwick R, et al. The Warwick-Edinburgh Mental Well-being Scale (WEMWBS): development and UK validation. *Health and Quality of Life Outcomes* 2007;**5**:63.
- 10 Wood AM, Joseph S. The absence of positive psychological (eudemonic) well-being as a risk factor for depression: a ten year cohort study. *J Affect Disord* 2010;**122**:213-7.
- 11 Keyes CL, Dhingra SS, Simoes EJ. Change in level of positive mental health as a predictor of future risk of mental illness. *Am J Public Health* 2010;**100**:2366-71.
- 12 Keyes CL, Simoes EJ. To flourish or not: positive mental health and all-cause mortality. *Am J Public Health* 2012;**102**:2164-72.

- 1  
2  
3 13 Bull T. Work life and mental well-being: single and coupled employed mothers in Southern  
4 Europe and Scandinavia. *Glob Health Promot* 2009;**16**:6-16.  
5  
6  
7 14 Van Lente E, Barry MM, Molcho M, et al. Measuring population mental health and social  
8 well-being. *Int J Public Health* 2012;**57**:421-30.  
9  
10  
11 15 Guite HF, Clark C, Ackrill G. The impact of the physical and urban environment on mental  
12 well-being. *Public Health* 2006;**120**:1117-26.  
13  
14  
15 16 Lehtinen V, Sohlman B, Kovess-Masfety V. Level of positive mental health in the European  
17 Union: Results from the Eurobarometer 2002 survey. *Clin Pract Epidemiol Ment Health* 2005;**1**:9.  
18  
19  
20 17 Eurofound EQoLS, 2011-2012, EQLS Data file, UK Data Archive, SN: 7316,  
21 <http://dx.doi.org/10.5255/UKDA-SN-7316-2>.  
22  
23  
24 18 Eurofound. Third European Quality of Life Survey - Quality of life in Europe: Impacts of the  
25 crisis. *Publications Office of the European Union*. Luxembourg 2012.  
26  
27  
28 19 World Health Organization Regional Office Europe. Well-being measures in primary health  
29 care: The Depcare project. Report on a WHO Meeting. Stockholm 1998.  
30  
31  
32 20 Bech P, Olsen LR, Kjoller M, et al. Measuring well-being rather than the absence of distress  
33 symptoms: A comparison of the SF-36 mental health subscale and the WHO-Five well-being scale. *Int*  
34 *J Methods Psychiatr Res* 2003;**12**:85-91.  
35  
36  
37 21 Niedhammer I, Kerrad S, Schutte S, et al. Material, psychosocial and behavioural factors  
38 associated with self-reported health in the Republic of Ireland: cross-sectional results from the SLAN  
39 survey. *BMJ Open* 2013;**3**.  
40  
41  
42 22 Schutte S, Chastang JF, Parent-Thirion A, et al. Association between socio-demographic,  
43 psychosocial, material and occupational factors and self-reported health among workers in Europe. *J*  
44 *Public Health (Oxf)* 2013;**Published Online First: 23 May 2013**.doi: **10.1093/pubmed/fdt050**.  
45  
46  
47 23 Springer KW, Mager Stellman J, Jordan-Young RM. Beyond a catalogue of differences: a  
48 theoretical frame and good practice guidelines for researching sex/gender in human health. *Soc Sci*  
49 *Med* 2012;**74**:1817-24.  
50  
51  
52  
53  
54  
55  
56  
57  
58  
59  
60



- 1  
2  
3 24 Blakely T, Subramanian SV. Multilevel Studies. In: Oakes JM, Kaufman JS, eds. *Methods in*  
4 *Social Epidemiology*. San Francisco: Jossey-Bass 2006:316-40.  
5  
6  
7 25 Katz MH. *Multilevel Analysis. A Practical Guide for Clinicians and Public Health Researchers*:  
8 Cambridge University Press 2011.  
9  
10  
11 26 Davoren MP, Fitzgerald E, Shiely F, et al. Positive mental health and well-being among a third  
12 level student population. *PLoS One* 2013;**8**:e74921.  
13  
14  
15 27 Winship C, Radbill L. Sampling Weights and Regression-Analysis. *Sociological Methods &*  
16 *Research* 1994;**23**:230-57.  
17  
18  
19 28 Waterman AS. Two conceptions of happiness: Contrasts of personal expressiveness  
20 (eudaimonia) and hedonic enjoyment. *J Pers Soc Psychol* 1993; **64**:678-91  
21  
22  
23 29 Lluch-Canut T, Puig-Llobet M, Sanchez-Ortega A, et al. Assessing positive mental health in  
24 people with chronic physical health problems: correlations with socio-demographic variables and  
25 physical health status. *BMC Public Health* 2013;**13**:928.  
26  
27  
28 30 Cable N, Bartley M, Chandola T, et al. Friends are equally important to men and women, but  
29 family matters more for men's well-being. *J Epidemiol Community Health* 2013;**67**:166-71.  
30  
31  
32 31 Hapke U, von der Lippe E, Busch M, et al. Psychische Gesundheit bei Erwachsenen in  
33 Deutschland. *Daten und Fakten: Ergebnisse der Studie "Gesundheit in Deutschland aktuell 2010"*:  
34 Robert Koch-Institut 2012.  
35  
36  
37 32 Dear K, Henderson S, Korten A. Well-being in Australia--findings from the National Survey of  
38 Mental Health and Well-being. *Soc Psychiatry Psychiatr Epidemiol* 2002;**37**:503-9.  
39  
40  
41 33 Keyes CLM, Westerhof GJ. Chronological and subjective age differences in flourishing mental  
42 health and major depressive episode. *Aging Ment Health* 2012;**16**:67-74.  
43  
44  
45 34 Esteban MM, Puerto M, Fernandez Cordero X, et al. Determinants of poor mental health in  
46 people aged 16 to 64 residing in a large city. *An Sist Sanit Navar* 2012;**35**:229-40.  
47  
48  
49 35 Meisenhelder JB, Chandler EN. Prayer and health outcomes in church lay leaders. *West J Nurs*  
50 *Res* 2000;**22**:706-16.  
51  
52  
53  
54  
55  
56  
57  
58  
59  
60

- 1  
2  
3 36 Gale CR, Dennison EM, Cooper C, et al. Neighbourhood environment and positive mental  
4 health in older people: the Hertfordshire Cohort Study. *Health Place* 2011;**17**:867-74.  
5  
6  
7 37 Rose R. How much does social capital add to individual health? A survey study of Russians.  
8  
9 *Soc Sci Med* 2000;**51**:1421-35.  
10  
11 38 McKenzie SK, Imlach Gunasekara F, Richardson K, et al. Do changes in socioeconomic factors  
12 lead to changes in mental health? Findings from three waves of a population based panel study. *J*  
13 *Epidemiol Community Health* 2013.  
14  
15  
16 39 Goldberg M, Chastang JF, Leclerc A, et al. Socioeconomic, demographic, occupational, and  
17 health factors associated with participation in a long-term epidemiologic survey: a prospective study  
18 of the French GAZEL cohort and its target population. *Am J Epidemiol* 2001;**154**:373-84.  
19  
20  
21 40 Malcolm E, Evans-Lacko S, Little K, et al. The impact of exercise projects to promote mental  
22 wellbeing. *J Ment Health* 2013;**22**:519-27.  
23  
24  
25  
26  
27  
28  
29  
30  
31  
32  
33  
34  
35  
36  
37  
38  
39  
40  
41  
42  
43  
44  
45  
46  
47  
48  
49  
50  
51  
52  
53  
54  
55  
56  
57  
58  
59  
60

## STROBE Statement—checklist of items that should be included in reports of observational studies

|                              | Item No | Recommendation                                                                                                                                                                                                                                                                                                                                                                                                                                                                                                                                                                                                                                                                                   |
|------------------------------|---------|--------------------------------------------------------------------------------------------------------------------------------------------------------------------------------------------------------------------------------------------------------------------------------------------------------------------------------------------------------------------------------------------------------------------------------------------------------------------------------------------------------------------------------------------------------------------------------------------------------------------------------------------------------------------------------------------------|
| <b>Title and abstract</b>    | 1       | (a) Indicate the study's design with a commonly used term in the title or the abstract<br>(b) Provide in the abstract an informative and balanced summary of what was done and what was found                                                                                                                                                                                                                                                                                                                                                                                                                                                                                                    |
| <b>Introduction</b>          |         |                                                                                                                                                                                                                                                                                                                                                                                                                                                                                                                                                                                                                                                                                                  |
| Background/rationale         | 2       | Explain the scientific background and rationale for the investigation being reported                                                                                                                                                                                                                                                                                                                                                                                                                                                                                                                                                                                                             |
| Objectives                   | 3       | State specific objectives, including any prespecified hypotheses                                                                                                                                                                                                                                                                                                                                                                                                                                                                                                                                                                                                                                 |
| <b>Methods</b>               |         |                                                                                                                                                                                                                                                                                                                                                                                                                                                                                                                                                                                                                                                                                                  |
| Study design                 | 4       | Present key elements of study design early in the paper                                                                                                                                                                                                                                                                                                                                                                                                                                                                                                                                                                                                                                          |
| Setting                      | 5       | Describe the setting, locations, and relevant dates, including periods of recruitment, exposure, follow-up, and data collection                                                                                                                                                                                                                                                                                                                                                                                                                                                                                                                                                                  |
| Participants                 | 6       | (a) <i>Cohort study</i> —Give the eligibility criteria, and the sources and methods of selection of participants. Describe methods of follow-up<br><i>Case-control study</i> —Give the eligibility criteria, and the sources and methods of case ascertainment and control selection. Give the rationale for the choice of cases and controls<br><i>Cross-sectional study</i> —Give the eligibility criteria, and the sources and methods of selection of participants<br>(b) <i>Cohort study</i> —For matched studies, give matching criteria and number of exposed and unexposed<br><i>Case-control study</i> —For matched studies, give matching criteria and the number of controls per case |
| Variables                    | 7       | Clearly define all outcomes, exposures, predictors, potential confounders, and effect modifiers. Give diagnostic criteria, if applicable                                                                                                                                                                                                                                                                                                                                                                                                                                                                                                                                                         |
| Data sources/<br>measurement | 8*      | For each variable of interest, give sources of data and details of methods of assessment (measurement). Describe comparability of assessment methods if there is more than one group                                                                                                                                                                                                                                                                                                                                                                                                                                                                                                             |
| Bias                         | 9       | Describe any efforts to address potential sources of bias                                                                                                                                                                                                                                                                                                                                                                                                                                                                                                                                                                                                                                        |
| Study size                   | 10      | Explain how the study size was arrived at                                                                                                                                                                                                                                                                                                                                                                                                                                                                                                                                                                                                                                                        |
| Quantitative variables       | 11      | Explain how quantitative variables were handled in the analyses. If applicable, describe which groupings were chosen and why                                                                                                                                                                                                                                                                                                                                                                                                                                                                                                                                                                     |
| Statistical methods          | 12      | (a) Describe all statistical methods, including those used to control for confounding<br>(b) Describe any methods used to examine subgroups and interactions<br>(c) Explain how missing data were addressed<br>(d) <i>Cohort study</i> —If applicable, explain how loss to follow-up was addressed<br><i>Case-control study</i> —If applicable, explain how matching of cases and controls was addressed<br><i>Cross-sectional study</i> —If applicable, describe analytical methods taking account of sampling strategy<br>(e) Describe any sensitivity analyses                                                                                                                                |

Continued on next page

**Results**

|                  |     |                                                                                                                                                                                                                                                                                                                                                                                                               |
|------------------|-----|---------------------------------------------------------------------------------------------------------------------------------------------------------------------------------------------------------------------------------------------------------------------------------------------------------------------------------------------------------------------------------------------------------------|
| Participants     | 13* | (a) Report numbers of individuals at each stage of study—eg numbers potentially eligible, examined for eligibility, confirmed eligible, included in the study, completing follow-up, and analysed<br>(b) Give reasons for non-participation at each stage<br>(c) Consider use of a flow diagram                                                                                                               |
| Descriptive data | 14* | (a) Give characteristics of study participants (eg demographic, clinical, social) and information on exposures and potential confounders<br>(b) Indicate number of participants with missing data for each variable of interest<br>(c) <i>Cohort study</i> —Summarise follow-up time (eg, average and total amount)                                                                                           |
| Outcome data     | 15* | <i>Cohort study</i> —Report numbers of outcome events or summary measures over time<br><i>Case-control study</i> —Report numbers in each exposure category, or summary measures of exposure<br><i>Cross-sectional study</i> —Report numbers of outcome events or summary measures                                                                                                                             |
| Main results     | 16  | (a) Give unadjusted estimates and, if applicable, confounder-adjusted estimates and their precision (eg, 95% confidence interval). Make clear which confounders were adjusted for and why they were included<br>(b) Report category boundaries when continuous variables were categorized<br>(c) If relevant, consider translating estimates of relative risk into absolute risk for a meaningful time period |
| Other analyses   | 17  | Report other analyses done—eg analyses of subgroups and interactions, and sensitivity analyses                                                                                                                                                                                                                                                                                                                |

**Discussion**

|                  |    |                                                                                                                                                                            |
|------------------|----|----------------------------------------------------------------------------------------------------------------------------------------------------------------------------|
| Key results      | 18 | Summarise key results with reference to study objectives                                                                                                                   |
| Limitations      | 19 | Discuss limitations of the study, taking into account sources of potential bias or imprecision. Discuss both direction and magnitude of any potential bias                 |
| Interpretation   | 20 | Give a cautious overall interpretation of results considering objectives, limitations, multiplicity of analyses, results from similar studies, and other relevant evidence |
| Generalisability | 21 | Discuss the generalisability (external validity) of the study results                                                                                                      |

**Other information**

|         |    |                                                                                                                                                               |
|---------|----|---------------------------------------------------------------------------------------------------------------------------------------------------------------|
| Funding | 22 | Give the source of funding and the role of the funders for the present study and, if applicable, for the original study on which the present article is based |
|---------|----|---------------------------------------------------------------------------------------------------------------------------------------------------------------|

\*Give information separately for cases and controls in case-control studies and, if applicable, for exposed and unexposed groups in cohort and cross-sectional studies.

**Note:** An Explanation and Elaboration article discusses each checklist item and gives methodological background and published examples of transparent reporting. The STROBE checklist is best used in conjunction with this article (freely available on the Web sites of PLoS Medicine at <http://www.plosmedicine.org/>, Annals of Internal Medicine at <http://www.annals.org/>, and Epidemiology at <http://www.epidem.com/>). Information on the STROBE Initiative is available at [www.strobe-statement.org](http://www.strobe-statement.org).

# BMJ Open

## Material, psychosocial, and socio-demographic determinants are associated with positive mental health in Europe: a cross-sectional study

|                                 |                                                                                                                                                                                                                                                                                                                                                                   |
|---------------------------------|-------------------------------------------------------------------------------------------------------------------------------------------------------------------------------------------------------------------------------------------------------------------------------------------------------------------------------------------------------------------|
| Journal:                        | <i>BMJ Open</i>                                                                                                                                                                                                                                                                                                                                                   |
| Manuscript ID:                  | bmjopen-2014-005095.R1                                                                                                                                                                                                                                                                                                                                            |
| Article Type:                   | Research                                                                                                                                                                                                                                                                                                                                                          |
| Date Submitted by the Author:   | 29-Apr-2014                                                                                                                                                                                                                                                                                                                                                       |
| Complete List of Authors:       | Dreger, Stefanie; University of Bremen; Institute for Public Health and Nursing Research, Dept. 5 Social Epidemiology<br>Buck, Christoph; Leibniz Institute for Prevention Research and Epidemiology – BIPS, Biometry and Data Management<br>Bolte, Gabriele; University of Bremen; Institute for Public Health and Nursing Research, Dept. 5 Social Epidemiology |
| <b>Primary Subject Heading</b>: | Epidemiology                                                                                                                                                                                                                                                                                                                                                      |
| Secondary Subject Heading:      | Public health, Mental health                                                                                                                                                                                                                                                                                                                                      |
| Keywords:                       | EPIDEMIOLOGY, MENTAL HEALTH, PUBLIC HEALTH                                                                                                                                                                                                                                                                                                                        |
|                                 |                                                                                                                                                                                                                                                                                                                                                                   |

SCHOLARONE™  
Manuscripts

1  
2  
3 **Material, psychosocial, and socio-demographic determinants are associated**  
4  
5 **with positive mental health in Europe: a cross-sectional study**  
6  
7  
8  
9  
10

11  
12  
13 Corresponding author:

14 Stefanie Dreger

15 Department of Social Epidemiology

16 Institute for Public Health and Nursing Research

17 University of Bremen

18 Grazer Straße 4

19 28359 Bremen

20 Tel.: 0421/218-68822

21 Fax: 0421/218-9868822

22 E-Mail: stefanie.dreger@uni-bremen.de  
23  
24  
25  
26  
27

28 Authors:

29 Stefanie Dreger <sup>1</sup>

30  
31 Christoph Buck <sup>2</sup>

32  
33  
34 Gabriele Bolte <sup>1</sup>

35  
36 <sup>1</sup> Department of Social Epidemiology

37 Institute for Public Health and Nursing Research

38 University of Bremen

39 Bremen

40 Germany  
41  
42  
43  
44

45 <sup>2</sup> Leibniz Institute for Prevention Research and Epidemiology – BIPS

46 Bremen

47 Germany  
48  
49  
50  
51  
52  
53  
54

55 Keywords: Positive Mental Health, determinants, Europe, mental well-being, mental health  
56  
57  
58  
59  
60

**ABSTRACT**

Objectives: To investigate the association between psychosocial, socio-demographic, and material determinants of positive mental health in Europe.

Design: Cross-sectional analysis of survey data.

Setting: 34 European Countries.

Participants: Representative Europe wide sample consisting of 21066 men and 22569 women aged 18 and over, from 34 European countries participating in the third wave of the European Quality of Life Survey (2011/2012).

Outcome: Positive mental health as measured by the WHO 5 – Mental Wellbeing Index, while the lowest 25% percentile indicated poor positive mental health.

Results: The prevalence of poor positive mental health was 30% in women and 24% in men. Material, as well as psychosocial, and socio-demographic factors were independently associated with poor positive mental health in a Europe wide sample from 34 European countries. When studying all factors together, the highest OR for poor positive mental health was reported for social exclusion (men: OR = 1.73, 95% CI = 1.59-1.90; women: OR = 1.69, 95% CI = 1.57-1.81) among the psychosocial factors. Among the material factors material deprivation had the highest impact (men: OR = 1.96, 95% CI = 1.78-2.15; women: OR = 1.93, 95% CI = 1.79-2.08).

Conclusion: This study gives a first overview on determinants of positive mental health on a European level and could be used as a first basis for preventive policies in the field of positive mental health in Europe.

**Strengths and limitations of this study**

- Large dataset with comparable data across Europe
- Overview of a broad range of material, psychosocial, and socio-demographic determinants of positive mental health among people in Europe
- Stratified analysis to take potential gender differences into account
- No causal interpretation possible, because of cross sectional nature of study
- Response rate of EQLS was lower than aspired and differed from more than 60% in Bulgaria, Cyprus, Malta, Poland and Slovakia to below 30% in Luxembourg and the UK

## BACKGROUND

According to the definition of the WHO mental health is a "state of well-being in which the individual realizes his skills, cope with the normal stresses of life, can work productively and fruitfully, and is able to make a contribution to his community".[1] Studies provide empirical support that mental health consists of two independent dimensions: mental ill-health and positive mental health (PMH) or mental wellbeing.[2, 3] Recent studies that have explicitly considered levels of positive mental health (PMH) in populations have illustrated that good mental health is more than just the absence of disease,[2, 4, 5] and that people can experience PMH even if diagnosed with a mental illness.[3] This is because mental wellbeing or PMH and mental illness are caused by different factors.[6] It has also been shown that low PMH is a risk factor for depression [7, 8] and absence of PMH has been associated with an increased risk of mortality.[2, 9]

The study of PMH is relatively young and there is still discussion on a common definition of PMH or mental wellbeing.[10] There are two (complementary) traditions in conceptualizing well-being: the hedonic approach emphasises feeling good (happiness, pleasant affect, life satisfaction) whereas the eudaimonic approach focuses on optimal social and psychological functioning.[5] A valid measure of PMH should include items that assess both – the hedonic and eudaimonic domain.[3, 5, 11, 12] Whereas various studies examined determinants of mental ill health, profound knowledge of determinants of positive mental health is lacking. Positive mental health can be influenced by socio-demographic, psychosocial or material factors.[13-16] However, to date studies that focus on PMH investigated only few determinants and looked at one country or at a very limited number of countries. Whereas prevalences of PMH in European countries have been reported before [17], no study so far has analysed a broad set of determinants of PMH considering a high number of European countries. The objective of our study was therefore to examine the association between socio-demographic, psychosocial, and material factors and PMH at a European level taking gender differences into account.

## METHODS

### Sample

This study is based on the European Quality of life Survey (EQLS), which is run every 4 years by the European Foundation for the improvement of living and working conditions. The third wave of the EQLS, which was carried out in 2011/2012 included people aged 18 years and older from 34 countries (EU-27, Croatia, Iceland, Montenegro, Former Yugoslav Republic of Macedonia, Serbia, Turkey, Kosovo). In all countries, data was collected via face-to face interviews at respondents' home that were selected by multistage random sampling. The overall response rate was 41%. A more detailed description of the EQLS 2012 can be found elsewhere.[18]



### Positive Mental Health

Positive Mental Health was measured with the World Health Organization 5 – Mental Wellbeing Index (WHO-5).[19] It is calculated from responses to five items: a) I have felt cheerful and in good spirits; b) I have felt calm and relaxed; c) I have felt active and vigorous; d) I woke up feeling fresh and rested; e) my daily life has been filled with things that interest me. The degree to which the aforesaid positive feelings were present in the last two weeks is scored on a 6-point Likert scale ranging from 0 ‘at no time’ to 5 ‘all of the time’. The scores to these five questions can amount to a maximum of 25, which is then multiplied by 4 to get to a maximum of 100, where 0 corresponds with worst thinkable well-being and 100 equals best thinkable well-being. The WHO-5 is considered a valid instrument to evaluate PMH in population based studies [20] and assesses PMH with items covering the eudaimonic perspective on wellbeing as well as items covering the hedonic dimensions of wellbeing.[17] An average score of the index was calculated for the study population and those with values below the 25% percentile were considered to have poor PMH.

### Potential determinants of positive mental health

Three groups of determinants of PMH were studied: socio-demographic, psychosocial, and material factors. This classification of determinants was inspired by studies that have used this classification in the field of self-rated health.[21-23]

*Socio-demographic factors were:* age, educational level (categorized into three groups according to the International Standard Classification of Education), urbanization level (living in rural/urban area) and citizenship (European/ non-European). All these variables were categorical variables. Since potential risk factors might have different meaning for men and women, gender was not considered as potential risk factor but as a structural variable and thus potential effect modifier. Therefore, all analyses were stratified by gender.[24]

*Psychosocial factors were:* Marital status, presence of children, social support (help from family/friends/neighbour/service provider in case of need for help around the house, advice, looking for a job, feeling depressed, financial problems; five items), social network (frequency of contact with family/friends/neighbours; eight items), political participation (attended a meeting of a trade union/political party/political action group, attended protest or demonstration, signed a petition, contacted a politician/public official; four items), trust (in parliament/legal system/press/police/government/local authorities; 6 items), religion (frequency of attending religious services), social exclusion (feelings of lack of recognition/confusion in life/exclusion/inferiority; four items). Marital status, presence of children, and religion were categorical variables. For social network, social support, political participation, trust, and social

1  
2  
3 exclusion, average scores were calculated and the median was used as cut-off point for the creation  
4 of dichotomized variables.

5  
6 *Material factors were:* household tenure, housing problems (shortage of space, rot in windows/  
7 doors/floors, damp/leaks in walls/roof, lack of bath or shower/indoor flushing toilet, place to sit  
8 outside; six items), neighbourhood problems (noise/air pollution/quality of drinking  
9 water/crime/violence/vandalism/litter/ traffic; six items), material deprivation (not able to afford the  
10 following amenities/activities: heating/vacation/furniture/meal with meat, chicken, fish every second  
11 day/new clothes/having friends and family for drinks or meals at least once a month; six items),  
12 financial problems (problems paying bills for rent/informal and consumer loans/electricity; four  
13 items), quality of public services (health services/education system/public transport/long term  
14 care/child care services/state pension system/social housing; six items).

15  
16 Household tenure was a categorical variable. Housing problems, neighbourhood problems, financial  
17 problems, material deprivation, and quality of public services were dichotomized at the median of  
18 the average score of the items.  
19

## 20 21 22 23 24 25 26 27 **Statistical methods**

28 First the distribution of socio-demographic, psychosocial, and material factors was described  
29 separately for men and women, and the percentage of poor PMH was reported for each category.

30 We performed random intercept multilevel logistic regression analyses to examine the association  
31 between the potential determinants and PMH.  
32

33  
34 Multilevel models are particularly appropriate for research designs where data for participants are  
35 organized on more than one level to take into account the between- and within variability of these  
36 hierarchically organized data (individuals, region, country).[25] The model contains a so-called fixed  
37 part and a random component. Individual determinants were introduced as fixed effects, and  
38 country and region were used as random intercepts in the multilevel analysis taking into account  
39 three levels of data: individuals (level 1) nested in 330 regions (level 2), which are nested in 34  
40 countries (level 3). Three separate models for women and men were computed to study the  
41 association of the groups of determinants (socio-demographic, psychosocial, and material factors)  
42 and PMH independently (model 1-3). After that, all variables that were significant at  $\alpha=0.05$  for at  
43 least one gender were included in the final model (model 4). Median odds ratios (MOR) were  
44 computed to quantify the country-level variation. MOR is defined as the median value of the odds  
45 ratio between the country at highest risk and the country at lowest risk when randomly picking out  
46 two countries.[26] The MOR equals 1 if there is no variation between countries and gets larger if the  
47 between-country variation increases.[27] The measure is directly comparable with fixed-effects odds  
48 ratios.[27]  
49  
50  
51  
52  
53  
54  
55  
56  
57  
58  
59  
60

1  
2  
3 Although interrelations between factors were found, no collinearity was detected, as the variance  
4 inflation factor was never greater than 1.9. Variance inflation factors greater than 2.5 may be  
5 problematic.[28]  
6

7 Since determinants of PMH have only rarely been studied, no literature on potential interactions was  
8 available. However, gender differences have been suggested in this context [14, 29] and men and  
9 women have different life circumstances. Therefore, we studied men and women separately.  
10

11 All statistical analyses were conducted using SAS statistical software version 9.3. The product of the  
12 design weight and post-stratification weight was used as weighting factor as recommended in the  
13 EQLS guidelines. In sensitivity analyses multilevel logistic regressions were conducted without  
14 weights, and with weights. The parameter estimates were substantially similar. Therefore the  
15 unweighted odds ratios are presented, as advised by Winship and Radbill,[30] because they are more  
16 efficient and the standard error is correct.  
17  
18  
19  
20  
21

## 22 23 **RESULTS**

24 Overall, 21066 men and 22569 women participated in the study and were considered for the present  
25 analysis. Table 1 shows the distribution of socio-demographic, psychosocial, and material factors and  
26 the percentage of people with poor PMH in each category for men and women separately. Overall,  
27 the proportion of poor PMH was higher in women than in men (30% vs 24%). Furthermore, women  
28 in the study sample were slightly older, and more often had a low education, did not work, had  
29 children, practiced religion, did not engage in political participation, were affected by material  
30 deprivation.  
31  
32  
33  
34  
35  
36  
37  
38  
39  
40  
41  
42  
43  
44  
45  
46  
47  
48  
49  
50  
51  
52  
53  
54  
55  
56  
57  
58  
59  
60

Table 1 Percentages of men and women with poor positive mental health by socio-demographic, psychosocial, and material factors\*

|                                  | Men    |    |            | Women  |    |            |
|----------------------------------|--------|----|------------|--------|----|------------|
|                                  | N      | %  | % poor PMH | N      | %  | % poor PMH |
| PMH                              |        |    |            |        |    |            |
| Good                             | 15,997 | 76 |            | 15,751 | 70 |            |
| Poor                             | 5,069  | 24 |            | 6,818  | 30 |            |
| <b>Socio-demographic factors</b> |        |    |            |        |    |            |
| Age (Years)                      |        |    |            |        |    |            |
| 18-24                            | 2,707  | 13 | 16         | 2,539  | 11 | 22         |
| 25-34                            | 3,919  | 19 | 21         | 3,742  | 17 | 24         |
| 35-49                            | 5,847  | 28 | 25         | 5,925  | 26 | 29         |
| 50-64                            | 4,932  | 23 | 27         | 5,227  | 23 | 32         |
| 65+                              | 3,662  | 17 | 28         | 5,136  | 23 | 38         |
| Education                        |        |    |            |        |    |            |
| Primary or less                  | 1,971  | 9  | 36         | 3,090  | 14 | 44         |
| Secondary                        | 13,945 | 67 | 24         | 13,983 | 62 | 30         |
| Tertiary                         | 5,004  | 24 | 19         | 5,366  | 24 | 22         |
| Working                          |        |    |            |        |    |            |
| Yes                              | 11,494 | 55 | 20         | 8,955  | 40 | 24         |
| no                               | 9,573  | 45 | 29         | 13,614 | 60 | 34         |
| Urbanization level               |        |    |            |        |    |            |
| Countryside or village           | 9,774  | 47 | 25         | 10,325 | 46 | 31         |
| Town or city                     | 11,247 | 54 | 24         | 12,187 | 54 | 30         |
| Citizenship                      |        |    |            |        |    |            |
| European                         | 20,509 | 98 | 24         | 22,094 | 98 | 30         |
| Non-European                     | 471    | 2  | 25         | 409    | 2  | 30         |
| <b>Psychosocial factors</b>      |        |    |            |        |    |            |
| Marital status                   |        |    |            |        |    |            |
| living with partner              | 11,990 | 57 | 24         | 11,678 | 52 | 28         |
| living alone                     | 8,926  | 43 | 24         | 10,749 | 48 | 32         |
| Children                         |        |    |            |        |    |            |
| Present                          | 13,065 | 62 | 26         | 16,272 | 72 | 33         |
| Absent                           | 8,001  | 38 | 22         | 6,297  | 28 | 24         |
| Religion                         |        |    |            |        |    |            |
| Practicing often                 | 4,831  | 23 | 25         | 6,854  | 31 | 31         |
| rarely                           | 6,875  | 33 | 23         | 7,637  | 34 | 29         |
| never                            | 9,255  | 44 | 24         | 7,976  | 36 | 31         |
| Social network                   |        |    |            |        |    |            |
| high                             | 4,097  | 19 | 24         | 4,563  | 20 | 31         |
| low                              | 16,969 | 81 | 24         | 18,007 | 80 | 30         |
| Social support                   |        |    |            |        |    |            |
| high                             | 10,070 | 48 | 21         | 10,467 | 46 | 26         |
| Low                              | 10,996 | 52 | 27         | 12,102 | 54 | 34         |
| Political participation          |        |    |            |        |    |            |
| yes                              | 5,410  | 26 | 21         | 4,818  | 22 | 25         |
| no                               | 15,268 | 74 | 25         | 17,380 | 78 | 32         |
| Level of trust                   |        |    |            |        |    |            |
| high                             | 10,359 | 49 | 18         | 10,947 | 49 | 24         |
| low                              | 10,708 | 51 | 30         | 11,623 | 52 | 36         |
| Social exclusion                 |        |    |            |        |    |            |
| low                              | 7,800  | 37 | 16         | 8,200  | 36 | 21         |
| high                             | 13,266 | 63 | 29         | 14,369 | 64 | 35         |
| <b>Material factors</b>          |        |    |            |        |    |            |
| Neighbourhood problems           |        |    |            |        |    |            |
| low                              | 8,024  | 38 | 21         | 8,547  | 38 | 27         |
| High                             | 13,043 | 62 | 26         | 14,022 | 62 | 32         |
| Housing problems                 |        |    |            |        |    |            |
| Absent                           | 13,381 | 64 | 20         | 13,893 | 62 | 25         |
| Present                          | 7,499  | 36 | 31         | 8,455  | 38 | 39         |
| Household tenure                 |        |    |            |        |    |            |
| tenant                           | 14,606 | 75 | 23         | 15,997 | 76 | 30         |
| owner                            | 4,832  | 25 | 25         | 5,059  | 24 | 30         |
| Material deprivation             |        |    |            |        |    |            |
| Absent                           | 9,843  | 51 | 14         | 8,991  | 43 | 18         |
| Present                          | 9,592  | 49 | 33         | 11,829 | 57 | 38         |

|                            |        |    |    |        |    |    |
|----------------------------|--------|----|----|--------|----|----|
| Financial problems         |        |    |    |        |    |    |
| no                         | 16,207 | 77 | 21 | 17,379 | 77 | 27 |
| yes                        | 4,859  | 23 | 35 | 5,191  | 23 | 41 |
| Quality of public services |        |    |    |        |    |    |
| good                       | 5,699  | 27 | 17 | 6,241  | 28 | 21 |
| poor                       | 15,367 | 73 | 27 | 16,329 | 72 | 34 |

\* product of the design weight and the post-stratification weight was applied

### Models 1-3

Table 2 presents the results for the multilevel logistic regression analyses, with each set of factors being studied separately for men and women. In model 1, which included socio-demographic factors, lower educational level, older age and not working was significantly associated with poor PMH among both genders. Additionally being citizen of a non-European country was associated with poor PMH in women. In model 2, including socio-demographic and psychosocial factors, living without a partner, practicing religion rarely or never, low social support, low levels of trust, and high levels of social exclusion were significantly associated with poor PMH among both genders, independently of socio-demographic factors. Having no children was additionally associated with poor PMH in women. The strongest effect in model 2 was seen for high social exclusion with an OR of 1.82 (95% CI =1.68-1.98) for men and 1.80 (95% = CI 1.68-1.92) for women. In model 3, including socio-demographic factors and material factors, all material factors, except household tenure, were associated with poor PMH among both genders, controlling for socio-demographic characteristics. The highest odds ratio was seen for material deprivation in both genders: The OR for men was 2.13 (95% CI = 2.00-2.41) and the OR for women was 2.17 (95% CI = 2.01-2.35). Urbanization level and social network were not associated with poor PMH in both genders in the respective models, and were therefore not included in model 4.

### Model 4

In model 4 the strongest associations with poor PMH among both genders were observed for higher age, social exclusion (men: OR=1.73, 95% CI = 1.59-1.90; women: OR=1.69, 95% CI = 1.57-1.81), and material deprivation (men: OR=1.96, 95% CI = 1.27-1.53; women: OR=1.93, 95% CI = 1.79-2.08). Moreover, living without a partner, lower education status, not working, practicing religion rarely or never, low social support, social exclusion, and all material factors were significantly associated with poor PMH among both genders. Not having children was independently associated with poor PMH in women only. Being citizen of a non-European country was no longer significant when taking into account all other factors in model 4.

### Country-level variation

Median odds ratios (MOR) differed only slightly between men and women, but decreased from model one to model 4, where more individual-level information was included. The MOR in model one, where socio-demographic factors are included, was 1.50 for men and 1.45 for women.

1  
2  
3 However, when studying all factors together in model 4 the MOR was lower, namely 1.31 for men  
4 and 1.30 for women. Thus, country-specific variation was larger with regard to effects of socio-  
5 demographic factors on mental health, but smaller, considering psychosocial (MOR=1.40 for both  
6 genders) or material factors (MOR=1.32 for both genders).  
7  
8  
9  
10  
11  
12  
13  
14  
15  
16  
17  
18  
19  
20  
21  
22  
23  
24  
25  
26  
27  
28  
29  
30  
31  
32  
33  
34  
35  
36  
37  
38  
39  
40  
41  
42  
43  
44  
45  
46  
47  
48  
49  
50  
51  
52  
53  
54  
55  
56  
57  
58  
59  
60

For peer review only

Table 2 Association between socio-demographic, psychosocial, and material factors and poor positive mental health for men and women, results from multilevel logistic regression analyses, showing OR and 95% CI

|                                  | Men               |                  |          |                  | Women            |          |          |                  |
|----------------------------------|-------------------|------------------|----------|------------------|------------------|----------|----------|------------------|
|                                  | Model 1           | Model 2*         | Model 3* | Model 4          | Model 1          | Model 2* | Model 3* | Model 4          |
| <b>Socio-demographic factors</b> |                   |                  |          |                  |                  |          |          |                  |
| Age (Years)                      |                   |                  |          |                  |                  |          |          |                  |
| 18-24                            | 1.00              |                  |          | 1.00             | 1.00             |          |          | 1.00             |
| 25-34                            | 1.78 (1.51-2.08)  |                  |          | 1.65 (1.37-1.98) | 1.37 (1.20-1.56) |          |          | 1.27 (1.09-1.50) |
| 35-49                            | 2.33 (2.00-2.70)  |                  |          | 2.26 (1.88-2.71) | 1.87 (1.65-2.11) |          |          | 1.69 (1.45-1.96) |
| 50-64                            | 2.17 (1.88-2.50)  |                  |          | 2.44 (2.03-2.93) | 1.87 (1.65-2.11) |          |          | 1.85 (1.59-2.15) |
| 65+                              | 1.77 (1.52-2.06)  |                  |          | 2.47 (2.03-3.01) | 1.97 (1.74-2.24) |          |          | 2.11 (1.81-2.46) |
| Education                        |                   |                  |          |                  |                  |          |          |                  |
| Primary or less                  | 1.00              |                  |          | 1.00             | 1.00             |          |          | 1.00             |
| Secondary                        | 0.66 (0.58-0.74)  |                  |          | 0.73 (0.64-0.83) | 0.68 (0.62-0.74) |          |          | 0.76 (0.69-0.84) |
| Tertiary                         | 0.50 (0.43-0.57)  |                  |          | 0.71 (0.61-0.83) | 0.47 (0.42-0.53) |          |          | 0.65 (0.58-0.73) |
| Working                          |                   |                  |          |                  |                  |          |          |                  |
| Yes                              | 1.00              |                  |          | 1.00             | 1.00             |          |          | 1.00             |
| No                               | 1.66 (1.52-1.81)  |                  |          | 1.27 (1.15-1.40) | 1.27 (1.18-1.37) |          |          | 1.13 (1.05-1.23) |
| Urbanization level               |                   |                  |          |                  |                  |          |          |                  |
| Countryside or village           | 1.00              |                  |          |                  | 1.00             |          |          |                  |
| Town or city                     | 1.01 (0.933-1.09) |                  |          |                  | 1.01 (0.95-1.07) |          |          |                  |
| Citizenship                      |                   |                  |          |                  |                  |          |          |                  |
| European                         | 1.00              |                  |          | 1.00             | 1.00             |          |          | 1.00             |
| Non-European                     | 1.22 (0.94-1.56)  |                  |          | 1.01 (0.77-1.33) | 1.31 (1.05-1.63) |          |          | 1.02 (0.81-1.30) |
| <b>Psychosocial factors</b>      |                   |                  |          |                  |                  |          |          |                  |
| Marital status                   |                   |                  |          |                  |                  |          |          |                  |
| Living with partner              |                   | 1.00             |          | 1.00             | 1.00             |          |          | 1.00             |
| Living alone                     |                   | 1.20 (1.09-1.31) |          | 1.18 (1.07-1.30) | 1.31 (1.23-1.40) |          |          | 1.17 (1.09-1.25) |
| Children                         |                   |                  |          |                  |                  |          |          |                  |
| Present                          |                   | 1.00             |          | 1.00             | 1.00             |          |          | 1.00             |
| Absent                           |                   | 0.96 (0.86-1.08) |          | 1.00 (0.89-1.12) | 0.83 (0.76-0.91) |          |          | 0.90 (0.82-0.98) |
| Religion                         |                   |                  |          |                  |                  |          |          |                  |
| Practicing often                 |                   | 1.00             |          | 1.00             | 1.00             |          |          | 1.00             |
| Rarely                           |                   | 1.11 (1.00-1.23) |          | 1.27 (1.14-1.42) | 1.09 (1.01-1.17) |          |          | 1.24 (1.14-1.35) |
| Never                            |                   | 1.27 (1.15-1.41) |          | 1.13 (1.01-1.26) | 1.27 (1.18-1.38) |          |          | 1.08 (1.00-1.17) |
| Social network                   |                   |                  |          |                  |                  |          |          |                  |
| High                             |                   | 1.00             |          |                  | 1.00             |          |          |                  |
| Low                              |                   | 1.03 (0.93-1.13) |          |                  | 1.04 (0.96-1.12) |          |          |                  |
| Social support                   |                   |                  |          |                  |                  |          |          |                  |
| High                             |                   | 1.00             |          | 1.00             | 1.00             |          |          | 1.00             |
| Low                              |                   | 1.30 (1.20-1.41) |          | 1.20 (1.10-1.31) | 1.44 (1.35-1.54) |          |          | 1.29 (1.20-1.38) |
| Political participation          |                   |                  |          |                  |                  |          |          |                  |
| Yes                              |                   | 1.00             |          |                  | 1.00             |          |          |                  |
| No                               |                   | 0.99 (0.91-1.08) |          |                  | 1.03 (0.95-1.11) |          |          |                  |
| Level of trust                   |                   |                  |          |                  |                  |          |          |                  |

|                               |                   |                   |                   |                   |                   |                   |                   |                   |
|-------------------------------|-------------------|-------------------|-------------------|-------------------|-------------------|-------------------|-------------------|-------------------|
| High                          |                   | 1.00              |                   | 1.00              |                   | 1.00              |                   | 1.00              |
| Low                           |                   | 1.66 (1.53-1.79)  |                   | 1.43 (1.31-1.55)  |                   | 1.51 (1.42-1.61)  |                   | 1.32 (1.23-1.41)  |
| Social exclusion              |                   |                   |                   |                   |                   |                   |                   |                   |
| Low                           |                   | 1.00              |                   | 1.00              |                   | 1.00              |                   | 1.00              |
| High                          |                   | 1.82 (1.68-1.98)  |                   | 1.73 (1.59-1.90)  |                   | 1.80 (1.68-1.92)  |                   | 1.69 (1.57-1.81)  |
| <b>Material factors</b>       |                   |                   |                   |                   |                   |                   |                   |                   |
| Neighborhood problems         |                   |                   |                   |                   |                   |                   |                   |                   |
| Low                           |                   |                   | 1.00              | 1.00              |                   |                   | 1.00              | 1.00              |
| High                          |                   |                   | 1.16 (1.07-1.27)  | 1.13 (1.04-1.23)  |                   |                   | 1.12 (1.04-1.20)  | 1.07 (1.00-1.15)  |
| Housing problems              |                   |                   |                   |                   |                   |                   |                   |                   |
| Absent                        |                   |                   | 1.00              | 1.00              |                   |                   | 1.00              | 1.00              |
| Present                       |                   |                   | 1.46 (1.34-1.60)  | 1.40 (1.30-1.52)  |                   |                   | 1.58 (1.48-1.69)  | 1.52 (1.43-1.63)  |
| Household tenure              |                   |                   |                   |                   |                   |                   |                   |                   |
| Tenant                        |                   |                   | 1.00              |                   |                   |                   | 1.00              |                   |
| Owner                         |                   |                   | 1.00 (0.89-1.11)  |                   |                   |                   | 1.00 (0.91-1.08)  |                   |
| Material deprivation          |                   |                   |                   |                   |                   |                   |                   |                   |
| Absent                        |                   |                   | 1.00              | 1.00              |                   |                   | 1.00              | 1.00              |
| Present                       |                   |                   | 2.19 (2.00-2.41)  | 1.96 (1.78-2.15)  |                   |                   | 2.17 (2.01-2.35)  | 1.93 (1.79-2.08)  |
| Financial problems            |                   |                   |                   |                   |                   |                   |                   |                   |
| No                            |                   |                   | 1.00              | 1.00              |                   |                   | 1.00              | 1.00              |
| Yes                           |                   |                   | 1.57 (1.42-1.73)  | 1.50 (1.34-1.63)  |                   |                   | 1.39 (1.29-1.51)  | 1.33 (1.23-1.43)  |
| Quality of public services    |                   |                   |                   |                   |                   |                   |                   |                   |
| Good                          |                   |                   | 1.00              | 1.00              |                   |                   | 1.00              | 1.00              |
| Poor                          |                   |                   | 1.54 (1.40-1.70)  | 1.39 (1.27-1.53)  |                   |                   | 1.64 (1.51-1.77)  | 1.51 (1.40-1.63)  |
|                               |                   |                   |                   |                   |                   |                   |                   |                   |
| <b>Random effects</b>         |                   |                   |                   |                   |                   |                   |                   |                   |
| Country level                 |                   |                   |                   |                   |                   |                   |                   |                   |
| Between country variance (SE) | 0.1767 (0.05066)  | 0.1265 (0.03799)  | 0.08360 (0.02876) | 0.07835 (0.02697) | 0.1711 (0.04749)  | 0.1258 (0.03594)  | 0.08378 (0.02609) | 0.07317 (0.02314) |
| MOR                           | 1.50              | 1.40              | 1.32              | 1.31              | 1.48              | 1.40              | 1.32              | 1.30              |
| Region level                  |                   |                   |                   |                   |                   |                   |                   |                   |
| Between region variance (SE)  | 0.07319 (0.01670) | 0.06726 (0.01644) | 0.08601 (0.02034) | 0.08965 (0.02038) | 0.07009 (0.01378) | 0.05600 (0.01303) | 0.05915 (0.01401) | 0.05245 (0.01312) |

\*Model 2 and 3 have been adjusted for socio-demographic factors of model 1



## DISCUSSION

This is one of the first studies to examine PMH in a large Europe wide sample and to our knowledge the first to report on a wide range of determinants. We grouped the determinants that have individually been reported in the literature with regard to mental health. Our study found a broad range of risk factors for poor PMH and our results are mainly in line with previous research that showed similar associations in single countries or single correlates, not controlling for other factors. However, most studies so far have looked at mental illness and not at PMH. Other studies covering positive aspects of mental health used single questions about happiness or life satisfaction. This approach is not the same as the concept of PMH, since it only covers the hedonistic perspective of wellbeing, in the sense of feeling happy.[31]

A large number of associations between socio-demographic, psychosocial, and material risk factors and PMH in citizens from 34 European countries were found in this study. Higher age, lower educational status and not working were associated with poor PMH among both genders. Of the psychosocial factors, practicing religion rarely or never, low social support, low levels of trust, and high social exclusion were associated with poor PMH among both genders. Living alone was associated with PMH in both genders. Not having children had a protective effect against poor positive mental health for women but not for men. All material determinants were associated with poor PMH among men and women.

Our results are in line with previous studies reporting that low educational level,[14, 32-34] and not working,[14, 33] are associated with poor mental wellbeing. The results on age and indicators of mental wellbeing are controversial, some studies reporting that older age groups are at higher risk for poor mental wellbeing,[14, 16, 32, 35] which would be in accordance with our results, others finding the opposite.[36-38] Associations between living area and mental wellbeing have been reported, however the direction of this relationship is not clear: living in a rural area [14] and living in a large city [16] have been associated with poor PMH. When classifying living area in two categories - urban or rural - we did not find a significant association between living area and PMH. Living alone,[16, 33, 35] low social support,[13, 14, 16, 34, 39] loneliness,[14] and exclusion [40] have been associated with poor positive mental or emotional health and a study in Russia found associations between high levels of trust and high emotional health.[40] We found that not or rarely attending religious services was associated with poor PMH. A previous study reported that frequency of prayer is associated with mental wellbeing.[38] There are some studies investigating the associations of material factors and mental illness. Poor economic condition [16] and neighbourhood problems [15, 39] have been associated with poor mental wellbeing or PMH before. However, research on the effect of other material factors on PMH is lacking.

1  
2  
3 In the intermediate models 1-3 age, social exclusion and material deprivation showed the strongest  
4 association with poor PMH among men and women. These three factors also appeared to have the  
5 strongest association with poor PMH in our final model (model 4), examining the effect of all  
6 determinants together. Particularly, all material factors were significantly associated with poor PMH  
7 in the separate as well as in the complete model, taking further socio-demographic and psychosocial  
8 factors into account. This group of determinants has not been studied extensively yet in the context  
9 of PMH but rather with regard to self-rated health [21, 22] or mental illness.[41] The fact that these  
10 factors stayed significant throughout all models is in agreement with the believe that material factors  
11 may have a direct (through biological pathways) or indirect effect (through e.g. behavioural factors)  
12 on health outcomes.[22] We might not have found a significant association of household tenure and  
13 PMH because there are cultural differences between countries in the approaches of buying a house  
14 or living for rent. Hence household tenure might not be an indicator for material prosperity in all  
15 countries.

16  
17  
18  
19  
20  
21  
22  
23  
24 One of the limitations of this study is its cross-sectional nature. When interpreting the relationship  
25 between the determinants, it needs to be kept in mind that no causal interpretation is possible. The  
26 response rate of 41% in the third round of the EQLS was lower than aspired and differed across  
27 countries.[18] It has been argued that non-participants may be more likely to belong to low social  
28 groups and to have poorer health outcomes.[42] This would be a selection bias and the prevalence of  
29 poor PMH as well as the association between some determinants, especially material determinants,  
30 might be underestimated. This study did not take into account (mediating) behavioural factors (e.g.  
31 physical activity), which may play a role in the association with PMH. Physical activity has a positive  
32 effect on PMH [43] and it could be hypothesized that living in areas with high neighbourhood  
33 problems might hinder leisure time-physical activity, hence physical activity could be a mediating  
34 factor in the association between material factors and PMH. For future studies it would be highly  
35 desirable to also include behavioural factors. Although the WHO-5 is a validated and relatively short  
36 measure of PMH in population surveys, there are more comprehensive measures to assess this  
37 complex construct, which should be used in future studies. Moreover, in this study the cut-off point  
38 for poor PMH has been set at the 25% percentile to look at people that have low levels of PMH.  
39 Using medians or quartiles as cut-off point when no official cut-off points are available is common  
40 practice. However, a standardized cut-off point for the WHO-5 would be desirable. The study of PMH  
41 is relatively young and there is still discussion on a common definition of PMH and different  
42 measurements exist. It will take some years to achieve agreement on the appropriate measurement  
43 and definition of PMH.[10] In this context it would be highly desirable to also test if instruments are  
44 gender sensitive. This study, on the other hand has many strengths. The large dataset with  
45 comparable data across Europe, allowed us to study each gender separately and comparability of  
46  
47  
48  
49  
50  
51  
52  
53  
54  
55  
56  
57  
58  
59  
60

1  
2  
3 data between 34 European countries enabled us to give an overall view of determinants of PMH  
4 among people in Europe. It used the WHO-5 as a validated measure for PMH and has analysed a  
5 broad picture of potential risk factors.  
6  
7

### 8 9 **Conclusion**

10 This study showed independent associations between various socio-demographic, psychosocial, and  
11 material determinants and PMH. Our study provides a first overview of the distribution of  
12 determinants and their association with PMH in Europe. Thereby it can be used as a first basis for  
13 confirmatory and more specific analysis on determinants of poor PMH as well as for the  
14 development of preventive programs or policies in this context.  
15  
16  
17  
18  
19  
20  
21  
22  
23  
24  
25  
26  
27  
28  
29  
30  
31  
32  
33  
34  
35  
36  
37  
38  
39  
40  
41  
42  
43  
44  
45  
46  
47  
48  
49  
50  
51  
52  
53  
54  
55  
56  
57  
58  
59  
60

1  
2  
3 **Acknowledgements** The authors gratefully acknowledge the European Foundation for the  
4 Improvement of Living and Working Conditions as the original data creators and the UK Data Archive.  
5 The European Foundation for the Improvement of Living and Working Conditions and the UK Data  
6 Archive bear no responsibility for the data analysis or interpretation.  
7

8  
9 **Funding** None

10  
11 **Contributorship Statement:**

12  
13  
14 SD was in charge of designing, analyzing and writing up for the manuscript.

15 CB advised on statistical analyses and helped to draft the manuscript.

16 GB participated in the conceptualization of the analyses and in the revision of the manuscript.

17 All authors read and approved the final manuscript.  
18

19  
20 **Competing interests** None

21  
22  
23 **Data Sharing Statement:** We analysed data of the European Quality of Life Survey (EQLS). Permission  
24 to analyse data of the EQLS can be requested at Eurofond  
25 (<http://www.eurofound.europa.eu/surveys/faq/index.htm>)  
26  
27  
28  
29  
30  
31  
32  
33  
34  
35  
36  
37  
38  
39  
40  
41  
42  
43  
44  
45  
46  
47  
48  
49  
50  
51  
52  
53  
54  
55  
56  
57  
58  
59  
60

## References

- 1 WHO. Strengthening mental health promotion. *Fact sheet no 220*. Geneva 2001.
- 2 Huppert FA, Whittington JE. Evidence for the independence of positive and negative well-being: Implications for quality of life assessment. *Br J Health Psychol* 2003;**8**:107-22.
- 3 Keyes CL. The mental health continuum: from languishing to flourishing in life. *J Health Soc Behav* 2002;**43**:207-22.
- 4 Keyes CLM. Mental illness and/or mental health? Investigating axioms of the complete state model of health. *J Consult Clin Psychol* 2005;**73**:539-48.
- 5 Hu Y, Stewart-Brown S, Twigg L, et al. Can the 12-item General Health Questionnaire be used to measure positive mental health? *Psychol Med* 2007;**37**:1005-13.
- 6 Ryff CD, Love GD, Urry HL, et al. Psychological well-being and ill-being: Do they have distinct or mirrored biological correlates? *Psychother Psychosom* 2006;**75**:85-95.
- 7 Wood AM, Joseph S. The absence of positive psychological (eudemonic) well-being as a risk factor for depression: a ten year cohort study. *J Affect Disord* 2010;**122**:213-7.
- 8 Keyes CL, Dhingra SS, Simoes EJ. Change in level of positive mental health as a predictor of future risk of mental illness. *Am J Public Health* 2010;**100**:2366-71.
- 9 Keyes CL, Simoes EJ. To flourish or not: positive mental health and all-cause mortality. *Am J Public Health* 2012;**102**:2164-72.
- 10 Huppert FA, So TT. Flourishing Across Europe: Application of a New Conceptual Framework for Defining Well-Being. *Soc Indic Res* 2013;**110**:837-61.
- 11 Ryan RM, Deci EL. On happiness and human potentials: a review of research on hedonic and eudaimonic well-being. *Annu Rev Psychol* 2001;**52**:141-66.
- 12 Tennant R, Hiller L, Fishwick R, et al. The Warwick-Edinburgh Mental Well-being Scale (WEMWBS): development and UK validation. *Health and Quality of Life Outcomes* 2007;**5**:63.
- 13 Bull T. Work life and mental well-being: single and coupled employed mothers in Southern Europe and Scandinavia. *Glob Health Promot* 2009;**16**:6-16.

- 1  
2  
3 14 Van Lente E, Barry MM, Molcho M, et al. Measuring population mental health and social  
4 well-being. *Int J Public Health* 2012;**57**:421-30.  
5  
6  
7 15 Guite HF, Clark C, Ackrill G. The impact of the physical and urban environment on mental  
8 well-being. *Public Health* 2006;**120**:1117-26.  
9  
10  
11 16 Lehtinen V, Sohlman B, Kovess-Masfety V. Level of positive mental health in the European  
12 Union: Results from the Eurobarometer 2002 survey. *Clin Pract Epidemiol Ment Health* 2005;**1**:9.  
13  
14 17 Eurofound. Quality of life in Europe: Subjective well-being. In: Union POotE, ed. Luxembourg  
15 2013.  
16  
17 18 Eurofound. Third European Quality of Life Survey - Quality of life in Europe: Impacts of the  
18 crisis. *Publications Office of the European Union*. Luxembourg 2012.  
19  
20 19 World Health Organization Regional Office Europe. Well-being measures in primary health  
21 care: The Depcare project. Report on a WHO Meeting. Stockholm 1998.  
22  
23 20 Bech P, Olsen LR, Kjoller M, et al. Measuring well-being rather than the absence of distress  
24 symptoms: A comparison of the SF-36 mental health subscale and the WHO-Five well-being scale. *Int*  
25 *J Methods Psychiatr Res* 2003;**12**:85-91.  
26  
27 21 Niedhammer I, Kerrad S, Schutte S, et al. Material, psychosocial and behavioural factors  
28 associated with self-reported health in the Republic of Ireland: cross-sectional results from the SLAN  
29 survey. *BMJ Open* 2013;**3**.  
30  
31 22 Schutte S, Chastang JF, Parent-Thirion A, et al. Association between socio-demographic,  
32 psychosocial, material and occupational factors and self-reported health among workers in Europe. *J*  
33 *Public Health (Oxf)* 2013; **Published Online First: 23 May 2013**.doi: 10.1093/pubmed/fdt050.  
34  
35 23 Aldabe B, Anderson R, Lyly-Yrjanainen M, et al. Contribution of material, occupational, and  
36 psychosocial factors in the explanation of social inequalities in health in 28 countries in Europe. *J*  
37 *Epidemiol Community Health* 2011;**65**:1123-31.  
38  
39  
40  
41  
42  
43  
44  
45  
46  
47  
48  
49  
50  
51  
52  
53  
54  
55  
56  
57  
58  
59  
60

- 1  
2  
3 24 Springer KW, Mager Stellman J, Jordan-Young RM. Beyond a catalogue of differences: a  
4 theoretical frame and good practice guidelines for researching sex/gender in human health. *Soc Sci*  
5 *Med* 2012;**74**:1817-24.  
6  
7  
8  
9 25 Blakely T, Subramanian SV. Multilevel Studies. In: Oakes JM, Kaufman JS, eds. *Methods in*  
10 *Social Epidemiology*. San Francisco: Jossey-Bass 2006:316-40.  
11  
12  
13 26 Merlo J, Chaix B, Ohlsson H, et al. A brief conceptual tutorial of multilevel analysis in social  
14 epidemiology: using measures of clustering in multilevel logistic regression to investigate contextual  
15 phenomena. *J Epidemiol Community Health* 2006;**60**:290-7.  
16  
17  
18  
19 27 Larsen K, Merlo J. Appropriate assessment of neighborhood effects on individual health:  
20 integrating random and fixed effects in multilevel logistic regression. *Am J Epidemiol* 2005;**161**:81-8.  
21  
22  
23  
24 28 Katz MH. *Multilevel Analysis. A Practical Guide for Clinicians and Public Health Researchers*:  
25 Cambridge University Press 2011.  
26  
27  
28  
29 29 Davoren MP, Fitzgerald E, Shiely F, et al. Positive mental health and well-being among a third  
30 level student population. *PLoS One* 2013;**8**:e74921.  
31  
32  
33 30 Winship C, Radbill L. Sampling Weights and Regression-Analysis. *Sociological Methods &*  
34 *Research* 1994;**23**:230-57.  
35  
36  
37 31 Waterman AS. Two conceptions of happiness: Contrasts of personal expressiveness  
38 (eudaimonia) and hedonic enjoyment. *J Pers Soc Psychol* 1993; **64**:678-91  
39  
40  
41 32 Lluch-Canut T, Puig-Llobet M, Sanchez-Ortega A, et al. Assessing positive mental health in  
42 people with chronic physical health problems: correlations with socio-demographic variables and  
43 physical health status. *BMC Public Health* 2013;**13**:928.  
44  
45  
46  
47 33 Cable N, Bartley M, Chandola T, et al. Friends are equally important to men and women, but  
48 family matters more for men's well-being. *J Epidemiol Community Health* 2013;**67**:166-71.  
49  
50  
51  
52 34 Hapke U, von der Lippe E, Busch M, et al. Psychische Gesundheit bei Erwachsenen in  
53 Deutschland. *Daten und Fakten: Ergebnisse der Studie "Gesundheit in Deutschland aktuell 2010"*:  
54 Robert Koch-Institut 2012.  
55  
56  
57  
58  
59  
60

- 1  
2  
3 35 Dear K, Henderson S, Korten A. Well-being in Australia--findings from the National Survey of  
4 Mental Health and Well-being. *Soc Psychiatry Psychiatr Epidemiol* 2002;**37**:503-9.  
5  
6  
7 36 Keyes CLM, Westerhof GJ. Chronological and subjective age differences in flourishing mental  
8 health and major depressive episode. *Aging Ment Health* 2012;**16**:67-74.  
9  
10  
11 37 Esteban MM, Puerto M, Fernandez Cordero X, et al. Determinants of poor mental health in  
12 people aged 16 to 64 residing in a large city. *An Sist Sanit Navar* 2012;**35**:229-40.  
13  
14  
15 38 Meisenhelder JB, Chandler EN. Prayer and health outcomes in church lay leaders. *West J Nurs*  
16 *Res* 2000;**22**:706-16.  
17  
18  
19  
20 39 Gale CR, Dennison EM, Cooper C, et al. Neighbourhood environment and positive mental  
21 health in older people: the Hertfordshire Cohort Study. *Health Place* 2011;**17**:867-74.  
22  
23  
24 40 Rose R. How much does social capital add to individual health? A survey study of Russians.  
25 *Soc Sci Med* 2000;**51**:1421-35.  
26  
27  
28  
29 41 McKenzie SK, Imlach Gunasekara F, Richardson K, et al. Do changes in socioeconomic factors  
30 lead to changes in mental health? Findings from three waves of a population based panel study. *J*  
31 *Epidemiol Community Health* 2013.  
32  
33  
34 42 Goldberg M, Chastang JF, Leclerc A, et al. Socioeconomic, demographic, occupational, and  
35 health factors associated with participation in a long-term epidemiologic survey: a prospective study  
36 of the French GAZEL cohort and its target population. *Am J Epidemiol* 2001;**154**:373-84.  
37  
38  
39  
40 43 Malcolm E, Evans-Lacko S, Little K, et al. The impact of exercise projects to promote mental  
41 wellbeing. *J Ment Health* 2013;**22**:519-27.  
42  
43  
44  
45  
46  
47  
48  
49  
50  
51  
52  
53  
54  
55  
56  
57  
58  
59  
60



1  
2  
3 **Material, psychosocial, and socio-demographic determinants are associated**  
4  
5 **with positive mental health in Europe: a cross-sectional study**  
6  
7  
8  
9  
10  
11  
12

13 Corresponding author:

14 Stefanie Dreger

15 Department of Social Epidemiology

16 Institute for Public Health and Nursing Research

17 University of Bremen

18 Grazer Straße 4

19 28359 Bremen

20 Tel.: 0421/218-68822

21 Fax: 0421/218-9868822

22 E-Mail: stefanie.dreger@uni-bremen.de  
23  
24  
25  
26  
27

28 Authors:

29 Stefanie Dreger <sup>1</sup>

30  
31 Christoph Buck <sup>2</sup>

32  
33  
34 Gabriele Bolte <sup>1</sup>

35  
36 <sup>1</sup> Department of Social Epidemiology

37 Institute for Public Health and Nursing Research

38 University of Bremen

39 Bremen

40 Germany  
41  
42  
43  
44

45 <sup>2</sup> Leibniz Institute for Prevention Research and Epidemiology – BIPS

46 Bremen

47 Germany  
48  
49  
50  
51  
52  
53  
54

55 Keywords: Positive Mental Health, determinants, Europe, mental well-being, mental health  
56  
57  
58  
59  
60

**ABSTRACT**

**Objectives:** To investigate the association between psychosocial, socio-demographic, and material determinants of positive mental health in Europe.

**Design:** Cross-sectional analysis of survey data.

**Setting:** 34 European Countries.

**Participants:** Representative Europe wide sample consisting of 21066 men and 22569 women aged 18 and over, from 34 European countries participating in the third wave of the European Quality of Life Survey (2011/2012).

**Outcome:** Positive mental health as measured by the WHO 5 – Mental Wellbeing Index, while the lowest 25% percentile indicated poor positive mental health.

**Results:** The prevalence of poor positive mental health was 30% in women and 24% in men. Material, as well as psychosocial, and socio-demographic factors were independently associated with poor positive mental health in a Europe wide sample from 34 European countries. When studying all factors together, the highest OR for poor positive mental health was reported for social exclusion (men: OR = 1.73, 95% CI = 1.59-1.90; women: OR = 1.69, 95% CI = 1.57-1.81) among the psychosocial factors. Among the material factors material deprivation had the highest impact (men: OR = 1.96, 95% CI = 1.78-2.15; women: OR = 1.93, 95% CI = 1.79-2.08).

**Conclusion:** This study gives a first overview on determinants of positive mental health on a European level and could be used as a first basis for preventive policies in the field of positive mental health in Europe.

**Strengths and limitations of this study**

- Large dataset with comparable data across Europe
- Overview of a broad range of material, psychosocial, and socio-demographic determinants of positive mental health among people in Europe
- Stratified analysis to take potential gender differences into account
- ~~Face-to-face interviews were conducted~~
- No causal interpretation possible, because of cross sectional nature of study
- Response rate of EQLS was lower than aspired and differed from more than 60% in Bulgaria, Cyprus, Malta, Poland and Slovakia to below 30% in Luxembourg and the UK

**BACKGROUND**

According to the definition of the WHO mental health is a "state of well-being in which the individual realizes his skills, cope with the normal stresses of life, can work productively and fruitfully, and is able to make a contribution to his community".[1] Studies provide empirical support that mental health consists of two independent dimensions: mental ill-health and positive mental health (PMH)

1  
2  
3 or mental wellbeing.[2, 3] Recent studies that have explicitly considered levels of positive mental  
4 health (PMH) in populations have illustrated that good mental health is ~~not only defined by the more~~  
5 ~~than just the~~ absence of disease,[2, 4, 5] and that people can experience PMH even if diagnosed with  
6 a mental illness.[3] This is because mental wellbeing or PMH and mental illness are caused by  
7 different factors.[6] It has also been shown that low PMH is a risk factor for depression [7, 8] and  
8 absence of PMH has been associated with an increased risk of mortality.[2, 9]

9  
10  
11  
12 The study of PMH is relatively young and there is still discussion on a common definition of PMH or  
13 mental wellbeing.[10] There are two (complementary) traditions in conceptualizing well-being: the  
14 hedonic approach emphasises feeling good (happiness, pleasant affect, life satisfaction) whereas the  
15 eudaimonic approach focuses on optimal social and psychological functioning.[5] A valid measure of  
16 PMH should include items that assess both – the hedonic and eudaimonic domain.[3, 5, 11, 12]  
17 Whereas various studies examined determinants of mental ill health, profound knowledge of  
18 determinants of positive mental health is lacking. Positive mental health can be influenced by socio-  
19 demographic, psychosocial or material factors.[13-16] ~~Epidemiological studies investigating PMH are~~  
20 ~~rare. However, to date These~~ studies that ~~do~~ focus on PMH investigated only few determinants and  
21 looked at one country or at a very limited number of countries. Whereas prevalences of PMH in  
22 European countries have been reported before [17], no study so far has analysed a broad set of  
23 determinants of PMH considering a high number of European countries. The objective of our study  
24 was therefore to examine the association between socio-demographic, psychosocial, and material  
25 factors and PMH at a European level taking gender differences into account.  
26  
27  
28  
29  
30  
31  
32  
33  
34  
35  
36

37 ~~Mental Health and its determinants have been examined in numerous studies. However, the focus~~  
38 ~~has mainly been on mental ill health. Yet, good mental health is more than just the absence of~~  
39 ~~mental illness~~

40  
41 ~~The positive dimension of mental health is also stressed in WHO's definition of health as stated in its~~  
42 ~~constitution: "Health is a state of complete physical, mental and social well-being and not merely the~~  
43 ~~absence of disease or infirmity."~~

44  
45  
46 ~~Nevertheless there is agreement that a multi-dimensional measure is needed to accurately assess~~  
47 ~~PMH~~

48  
49  
50 ~~These two concepts are not two opposite sides of one continuum but rather constitute distinct,~~  
51 ~~though correlated, axes with independent determinants. Keyes' two continua model demonstrates~~  
52 ~~this way of looking at mental illness and PMH. The one continuum reflects the presence or absence~~  
53 ~~of mental illness, and overlaps in part with the other continuum, which represents the presence or~~  
54 ~~absence of PMH.~~  
55  
56  
57  
58  
59  
60

## METHODS

### Sample

This study is based on the European Quality of life Survey (EQLS), which is run every 4 years by the European Foundation for the improvement of living and working conditions. The third wave of the EQLS, which was carried out in 2011/2012 included people aged 18 years and older from 34 countries (EU-27, Croatia, Iceland, Montenegro, Former Yugoslav Republic of Macedonia, Serbia, Turkey, Kosovo). In all countries, data was collected via face-to face interviews at respondents' home that were selected by multistage random sampling. The overall response rate was 41%. A more detailed description of the EQLS 2012 can be found elsewhere.[18]

### Positive Mental Health

Positive Mental Health was measured with the World Health Organization 5 – Mental Wellbeing Index (WHO-5).[19] It is calculated from responses to five items: a) I have felt cheerful and in good spirits; b) I have felt calm and relaxed; c) I have felt active and vigorous; d) I woke up feeling fresh and rested; e) my daily life has been filled with things that interest me. The degree to which the aforesaid positive feelings were present in the last two weeks is scored on a 6-point Likert scale ranging from 0 'at no time' to 5 'all of the time'. The scores to these five questions can amount to a maximum of 25, which is then multiplied by 4 to get to a maximum of 100, where 0 corresponds with worst thinkable well-being and 100 equals best thinkable well-being. The WHO-5 is considered a valid instrument to evaluate PMH in population based studies [20] and assesses PMH with items covering the eudaimonic perspective on wellbeing as well as items covering the hedonic dimensions of wellbeing.[17] An average score of the index was calculated for the study population and those with values below the 25% percentile were considered to have poor PMH.

### Potential determinants of positive mental health

Three groups of determinants of PMH were studied: socio-demographic, psychosocial, and material factors. This classification of determinants was inspired by studies that have used this classification in the field of self-rated health.[21-23]

*Socio-demographic factors were:* age, educational level (categorized into three groups according to the International Standard Classification of Education), urbanization level (living in rural/urban area) and citizenship (European/ non-European). All these variables were categorical variables. Since potential risk factors might have different meaning for men and women, gender was not considered as potential risk factor but as a structural variable and thus potential effect modifier. Therefore, all analyses were stratified by gender.[24]

1  
2  
3 *Psychosocial factors* were: Marital status, presence of children, social support (help from  
4 family/friends/neighbour/service provider in case of need for help around the house, advice, looking  
5 for a job, feeling depressed, financial problems; five items), social network (frequency of contact with  
6 family/friends/neighbours; eight items), political participation (attended a meeting of a trade  
7 union/political party/political action group, attended protest or demonstration, signed a petition,  
8 contacted a politician/public official; four items), trust (in parliament/legal  
9 system/press/police/government/local authorities; 6 items), religion (frequency of attending  
10 religious services), social exclusion (feelings of lack of recognition/confusion in  
11 life/exclusion/inferiority; four items). Marital status, presence of children, and religion were  
12 categorical variables. For social network, social support, political participation, trust, and social  
13 exclusion, average scores were calculated and the median was used as cut-off point for the creation  
14 of dichotomized variables.

15  
16  
17  
18  
19  
20  
21  
22 *Material factors were:* household tenure, housing problems (shortage of space, rot in windows/  
23 doors/floors, damp/leaks in walls/roof, lack of bath or shower/indoor flushing toilet, place to sit  
24 outside; six items), neighbourhood problems (noise/air pollution/quality of drinking  
25 water/crime/violence/vandalism/litter/ traffic; six items), material deprivation (not able to afford the  
26 following amenities/activities: heating/vacation/furniture/meal with meat, chicken, fish every second  
27 day/new clothes/having friends and family for drinks or meals at least once a month; six items),  
28 financial problems (problems paying bills for rent/informal and consumer loans/electricity; four  
29 items), quality of public services (health services/education system/public transport/long term  
30 care/child care services/state pension system/social housing; six items).

31  
32 Household tenure was a categorical variable. Housing problems, neighbourhood problems, financial  
33 problems, material deprivation, and quality of public services were dichotomized at the median of  
34 the average score of the items.  
35  
36

### 37 **Statistical methods**

38 First the distribution of socio-demographic, psychosocial, and material factors was described  
39 separately for men and women, and the percentage of poor PMH was reported for each category.

40  
41  
42  
43  
44  
45  
46  
47  
48 We performed random intercept multilevel logistic regression analyses to examine the association  
49 between the potential determinants and PMH.

50  
51  
52 ~~The association between the potential determinants and PMH was examined using multilevel logistic~~  
53 ~~regression analysis.~~ Multilevel models are particularly appropriate for research designs where data  
54 for participants are organized on more than one level to take into account the between- and within  
55 variability of these hierarchically organized data (individuals, region, country).[25] The model  
56 contains a so-called fixed part and a random component. Individual determinants were introduced as  
57  
58  
59  
60

1  
2  
3 fixed effects, and country and region were used as random intercepts in the multilevel analysis taking  
4 into account three levels of data: individuals (level 1) nested in 330 regions (level 2), which are  
5 nested in 34 countries (level 3). Three separate models for women and men were computed to study  
6 the association of the groups of determinants (socio-demographic, psychosocial, and material  
7 factors) and PMH independently (model 1-3). After that, all variables that were significant at  $\alpha=0.05$   
8 for at least one gender were included in the final model (model 4). Median odds ratios (MOR) were  
9 computed to quantify the country-level variation. MOR is defined as the median value of the odds  
10 ratio between the country at highest risk and the country at lowest risk when randomly picking out  
11 two countries.[26] The MOR equals 1 if there is no variation between countries and gets larger if the  
12 between-country variation increases.[27] The measure is directly comparable with fixed-effects odds  
13 ratios.[27]

14  
15 Although interrelations between factors were found, no collinearity was detected, as the variance  
16 inflation factor was never greater than 1.9. Variance inflation factors greater than 2.5 may be  
17 problematic.[28]

18  
19 Since determinants of PMH have only rarely been studied, no literature on potential interactions was  
20 available. However, gender differences have been suggested in this context [14, 29] and men and  
21 women have different life circumstances. Therefore, we studied men and women separately.

22  
23 All statistical analyses were conducted using SAS statistical software version 9.3. The product of the  
24 design weight and post-stratification weight was used as weighting factor as recommended in the  
25 EQLS guidelines. In sensitivity analyses multilevel logistic regressions were conducted without  
26 weights, and with weights. The parameter estimates were substantially similar. Therefore the  
27 unweighted odds ratios are presented, as advised by Winship and Radbill,[30] because they are more  
28 efficient and the standard error is correct.

## 29 30 31 32 33 34 35 36 37 38 39 40 41 **RESULTS**

42 Overall, 21066 men and 22569 women participated in the study and were considered for the present  
43 analysis. Table 1 shows the distribution of socio-demographic, psychosocial, and material factors and  
44 the percentage of people with poor PMH in each category for men and women separately. Overall,  
45 the proportion of poor PMH was higher in women than in men (30% vs 24%). Furthermore, women  
46 in the study sample were slightly older, and more often had a low education, did not work, had  
47 children, practiced religion, did not engage in political participation, were affected by material  
48 deprivation. The prevalence of poor mental health ranged from 9.50% in Iceland to 36.13% in Serbia  
49 among men and from 15.25% in Finland to 45.16% in Serbia among women (results not shown).  
50  
51  
52  
53  
54  
55  
56  
57  
58  
59  
60

Table 1 Percentages of men and women with poor positive mental health by socio-demographic, psychosocial, and material factors\*

|                                  | Men    |    |            | Women  |    |            |
|----------------------------------|--------|----|------------|--------|----|------------|
|                                  | N      | %  | % poor PMH | N      | %  | % poor PMH |
| PMH                              |        |    |            |        |    |            |
| Good                             | 15,997 | 76 |            | 15,751 | 70 |            |
| Poor                             | 5,069  | 24 |            | 6,818  | 30 |            |
| <b>Socio-demographic factors</b> |        |    |            |        |    |            |
| Age (Years)                      |        |    |            |        |    |            |
| 18-24                            | 2,707  | 13 | 16         | 2,539  | 11 | 22         |
| 25-34                            | 3,919  | 19 | 21         | 3,742  | 17 | 24         |
| 35-49                            | 5,847  | 28 | 25         | 5,925  | 26 | 29         |
| 50-64                            | 4,932  | 23 | 27         | 5,227  | 23 | 32         |
| 65+                              | 3,662  | 17 | 28         | 5,136  | 23 | 38         |
| Education                        |        |    |            |        |    |            |
| Primary or less                  | 1,971  | 9  | 36         | 3,090  | 14 | 44         |
| Secondary                        | 13,945 | 67 | 24         | 13,983 | 62 | 30         |
| Tertiary                         | 5,004  | 24 | 19         | 5,366  | 24 | 22         |
| Working                          |        |    |            |        |    |            |
| Yes                              | 11,494 | 55 | 20         | 8,955  | 40 | 24         |
| no                               | 9,573  | 45 | 29         | 13,614 | 60 | 34         |
| Urbanization level               |        |    |            |        |    |            |
| Countryside or village           | 9,774  | 47 | 25         | 10,325 | 46 | 31         |
| Town or city                     | 11,247 | 54 | 24         | 12,187 | 54 | 30         |
| Citizenship                      |        |    |            |        |    |            |
| European                         | 20,509 | 98 | 24         | 22,094 | 98 | 30         |
| Non-European                     | 471    | 2  | 25         | 409    | 2  | 30         |
| <b>Psychosocial factors</b>      |        |    |            |        |    |            |
| Marital status                   |        |    |            |        |    |            |
| living with partner              | 11,990 | 57 | 24         | 11,678 | 52 | 28         |
| living alone                     | 8,926  | 43 | 24         | 10,749 | 48 | 32         |
| Children                         |        |    |            |        |    |            |
| Present                          | 13,065 | 62 | 26         | 16,272 | 72 | 33         |
| Absent                           | 8,001  | 38 | 22         | 6,297  | 28 | 24         |
| Religion                         |        |    |            |        |    |            |
| Practicing often                 | 4,831  | 23 | 25         | 6,854  | 31 | 31         |
| rarely                           | 6,875  | 33 | 23         | 7,637  | 34 | 29         |
| never                            | 9,255  | 44 | 24         | 7,976  | 36 | 31         |
| Social network                   |        |    |            |        |    |            |
| high                             | 4,097  | 19 | 24         | 4,563  | 20 | 31         |
| low                              | 16,969 | 81 | 24         | 18,007 | 80 | 30         |
| Social support                   |        |    |            |        |    |            |
| high                             | 10,070 | 48 | 21         | 10,467 | 46 | 26         |
| Low                              | 10,996 | 52 | 27         | 12,102 | 54 | 34         |
| Political participation          |        |    |            |        |    |            |
| yes                              | 5,410  | 26 | 21         | 4,818  | 22 | 25         |
| no                               | 15,268 | 74 | 25         | 17,380 | 78 | 32         |
| Level of trust                   |        |    |            |        |    |            |
| high                             | 10,359 | 49 | 18         | 10,947 | 49 | 24         |
| low                              | 10,708 | 51 | 30         | 11,623 | 52 | 36         |
| Social exclusion                 |        |    |            |        |    |            |
| low                              | 7,800  | 37 | 16         | 8,200  | 36 | 21         |
| high                             | 13,266 | 63 | 29         | 14,369 | 64 | 35         |
| <b>Material factors</b>          |        |    |            |        |    |            |
| Neighbourhood problems           |        |    |            |        |    |            |
| low                              | 8,024  | 38 | 21         | 8,547  | 38 | 27         |
| High                             | 13,043 | 62 | 26         | 14,022 | 62 | 32         |
| Housing problems                 |        |    |            |        |    |            |
| Absent                           | 13,381 | 64 | 20         | 13,893 | 62 | 25         |
| Present                          | 7,499  | 36 | 31         | 8,455  | 38 | 39         |
| Household tenure                 |        |    |            |        |    |            |
| tenant                           | 14,606 | 75 | 23         | 15,997 | 76 | 30         |
| owner                            | 4,832  | 25 | 25         | 5,059  | 24 | 30         |
| Material deprivation             |        |    |            |        |    |            |
| Absent                           | 9,843  | 51 | 14         | 8,991  | 43 | 18         |
| Present                          | 9,592  | 49 | 33         | 11,829 | 57 | 38         |
| Financial problems               |        |    |            |        |    |            |
| no                               | 16,207 | 77 | 21         | 17,379 | 77 | 27         |
| yes                              | 4,859  | 23 | 35         | 5,191  | 23 | 41         |
| Quality of public services       |        |    |            |        |    |            |
| good                             | 5,699  | 27 | 17         | 6,241  | 28 | 21         |
| poor                             | 15,367 | 73 | 27         | 16,329 | 72 | 34         |

\* product of the design weight and the post-stratification weight was applied

### Models 1-3

Table 2 presents the results for the multilevel logistic regression analyses, with each set of factors being studied separately for men and women. In model 1, which included socio-demographic factors, lower educational level, older age and not working was significantly associated with poor PMH among both genders. Additionally being citizen of a non-European country was associated with poor PMH in women. In model 2, including socio-demographic and psychosocial factors, living without a partner, practicing religion rarely or never, low social support, low levels of trust, and high levels of social exclusion were significantly associated with poor PMH among both genders, independently of socio-demographic factors. Having no children was additionally associated with poor PMH in women. The strongest effect in model 2 was seen for high social exclusion with an OR of 1.82 (95% CI =1.68-1.98) for men and 1.80 (95% = CI 1.68-1.92) for women. In model 3, including socio-demographic factors and material factors, all material factors, except household tenure, were associated with poor PMH among both genders, controlling for socio-demographic characteristics. The highest odds ratio was seen for material deprivation in both genders: The OR for men was 2.13 (95% CI = 2.00-2.41) and the OR for women was 2.17 (95% CI = 2.01-2.35). Urbanization level and social network were not associated with poor PMH in both genders in the respective models, and were therefore not included in model 4.

### Model 4

In model 4 the strongest associations with poor PMH among both genders were observed for higher age, social exclusion (men: OR=1.73, 95% CI = 1.59-1.90; women: OR=1.69, 95% CI = 1.57-1.81), and material deprivation (men: OR=1.96, 95% CI = 1.27-1.53; women: OR=1.93, 95% CI = 1.79-2.08). Moreover, living without a partner, lower education status, not working, practicing religion rarely or never, low social support, social exclusion, and all material factors were significantly associated with poor PMH among both genders. Not having children was independently associated with poor PMH in women only. Being citizen of a non-European country was no longer significant when taking into account all other factors in model 4.

### Country-level variation

Median odds ratios (MOR) differed only slightly between men and women, but decreased from model one to model 4, where more individual-level information was included. The MOR in model one, where socio-demographic factors are included, was 1.50 for men and 1.45 for women. However, when studying all factors together in model 4 the MOR was lower, namely 1.31 for men and 1.30 for women. Thus, country-specific variation was larger with regard to effects of socio-



1  
2  
3 demographic factors on mental health, but smaller, considering psychosocial (MOR=1.40 for both  
4 genders) or material factors (MOR=1.32 for both genders).  
5  
6  
7  
8  
9  
10  
11  
12  
13  
14  
15  
16  
17  
18  
19  
20  
21  
22  
23  
24  
25  
26  
27  
28  
29  
30  
31  
32  
33  
34  
35  
36  
37  
38  
39  
40  
41  
42  
43  
44  
45  
46  
47  
48  
49  
50  
51  
52  
53  
54  
55  
56  
57  
58  
59  
60

For peer review only

Table 2 Association between socio-demographic, psychosocial, and material factors and poor positive mental health for men and women, results from multilevel logistic regression analyses, showing OR and 95% CI

|                                  | Men               |                  |          |                  | Women            |          |          |                  |
|----------------------------------|-------------------|------------------|----------|------------------|------------------|----------|----------|------------------|
|                                  | Model 1           | Model 2*         | Model 3* | Model 4          | Model 1          | Model 2* | Model 3* | Model 4          |
| <b>Socio-demographic factors</b> |                   |                  |          |                  |                  |          |          |                  |
| Age (Years)                      |                   |                  |          |                  |                  |          |          |                  |
| 18-24                            | 1.00              |                  |          | 1.00             | 1.00             |          |          | 1.00             |
| 25-34                            | 1.78 (1.51-2.08)  |                  |          | 1.65 (1.37-1.98) | 1.37 (1.20-1.56) |          |          | 1.27 (1.09-1.50) |
| 35-49                            | 2.33 (2.00-2.70)  |                  |          | 2.26 (1.88-2.71) | 1.87 (1.65-2.11) |          |          | 1.69 (1.45-1.96) |
| 50-64                            | 2.17 (1.88-2.50)  |                  |          | 2.44 (2.03-2.93) | 1.87 (1.65-2.11) |          |          | 1.85 (1.59-2.15) |
| 65+                              | 1.77 (1.52-2.06)  |                  |          | 2.47 (2.03-3.01) | 1.97 (1.74-2.24) |          |          | 2.11 (1.81-2.46) |
| Education                        |                   |                  |          |                  |                  |          |          |                  |
| Primary or less                  | 1.00              |                  |          | 1.00             | 1.00             |          |          | 1.00             |
| Secondary                        | 0.66 (0.58-0.74)  |                  |          | 0.73 (0.64-0.83) | 0.68 (0.62-0.74) |          |          | 0.76 (0.69-0.84) |
| Tertiary                         | 0.50 (0.43-0.57)  |                  |          | 0.71 (0.61-0.83) | 0.47 (0.42-0.53) |          |          | 0.65 (0.58-0.73) |
| Working                          |                   |                  |          |                  |                  |          |          |                  |
| Yes                              | 1.00              |                  |          | 1.00             | 1.00             |          |          | 1.00             |
| No                               | 1.66 (1.52-1.81)  |                  |          | 1.27 (1.15-1.40) | 1.27 (1.18-1.37) |          |          | 1.13 (1.05-1.23) |
| Urbanization level               |                   |                  |          |                  |                  |          |          |                  |
| Countryside or village           | 1.00              |                  |          |                  | 1.00             |          |          |                  |
| Town or city                     | 1.01 (0.933-1.09) |                  |          |                  | 1.01 (0.95-1.07) |          |          |                  |
| Citizenship                      |                   |                  |          |                  |                  |          |          |                  |
| European                         | 1.00              |                  |          | 1.00             | 1.00             |          |          | 1.00             |
| Non-European                     | 1.22 (0.94-1.56)  |                  |          | 1.01 (0.77-1.33) | 1.31 (1.05-1.63) |          |          | 1.02 (0.81-1.30) |
| <b>Psychosocial factors</b>      |                   |                  |          |                  |                  |          |          |                  |
| Marital status                   |                   |                  |          |                  |                  |          |          |                  |
| Living with partner              |                   | 1.00             |          | 1.00             | 1.00             | 1.00     |          | 1.00             |
| Living alone                     |                   | 1.20 (1.09-1.31) |          | 1.18 (1.07-1.30) | 1.31 (1.23-1.40) |          |          | 1.17 (1.09-1.25) |
| Children                         |                   |                  |          |                  |                  |          |          |                  |
| Present                          |                   | 1.00             |          | 1.00             | 1.00             | 1.00     |          | 1.00             |
| Absent                           |                   | 0.96 (0.86-1.08) |          | 1.00 (0.89-1.12) | 0.83 (0.76-0.91) |          |          | 0.90 (0.82-0.98) |
| Religion                         |                   |                  |          |                  |                  |          |          |                  |
| Practicing often                 |                   | 1.00             |          | 1.00             | 1.00             | 1.00     |          | 1.00             |
| Rarely                           |                   | 1.11 (1.00-1.23) |          | 1.27 (1.14-1.42) | 1.09 (1.01-1.17) |          |          | 1.24 (1.14-1.35) |
| Never                            |                   | 1.27 (1.15-1.41) |          | 1.13 (1.01-1.26) | 1.27 (1.18-1.38) |          |          | 1.08 (1.00-1.17) |
| Social network                   |                   |                  |          |                  |                  |          |          |                  |
| High                             |                   | 1.00             |          |                  | 1.00             |          |          |                  |
| Low                              |                   | 1.03 (0.93-1.13) |          |                  | 1.04 (0.96-1.12) |          |          |                  |
| Social support                   |                   |                  |          |                  |                  |          |          |                  |
| High                             |                   | 1.00             |          | 1.00             | 1.00             | 1.00     |          | 1.00             |
| Low                              |                   | 1.30 (1.20-1.41) |          | 1.20 (1.10-1.31) | 1.44 (1.35-1.54) |          |          | 1.29 (1.20-1.38) |
| Political participation          |                   |                  |          |                  |                  |          |          |                  |
| Yes                              |                   | 1.00             |          |                  | 1.00             |          |          |                  |
| No                               |                   | 0.99 (0.91-1.08) |          |                  | 1.03 (0.95-1.11) |          |          |                  |
| Level of trust                   |                   |                  |          |                  |                  |          |          |                  |

|                               |                   |                   |                   |                   |                   |                   |                   |                   |
|-------------------------------|-------------------|-------------------|-------------------|-------------------|-------------------|-------------------|-------------------|-------------------|
| High                          |                   | 1.00              |                   | 1.00              |                   | 1.00              |                   | 1.00              |
| Low                           |                   | 1.66 (1.53-1.79)  |                   | 1.43 (1.31-1.55)  |                   | 1.51 (1.42-1.61)  |                   | 1.32 (1.23-1.41)  |
| Social exclusion              |                   |                   |                   |                   |                   |                   |                   |                   |
| Low                           |                   | 1.00              |                   | 1.00              |                   | 1.00              |                   | 1.00              |
| High                          |                   | 1.82 (1.68-1.98)  |                   | 1.73 (1.59-1.90)  |                   | 1.80 (1.68-1.92)  |                   | 1.69 (1.57-1.81)  |
| <b>Material factors</b>       |                   |                   |                   |                   |                   |                   |                   |                   |
| Neighborhood problems         |                   |                   |                   |                   |                   |                   |                   |                   |
| Low                           |                   |                   | 1.00              | 1.00              |                   |                   | 1.00              | 1.00              |
| High                          |                   |                   | 1.16 (1.07-1.27)  | 1.13 (1.04-1.23)  |                   |                   | 1.12 (1.04-1.20)  | 1.07 (1.00-1.15)  |
| Housing problems              |                   |                   |                   |                   |                   |                   |                   |                   |
| Absent                        |                   |                   | 1.00              | 1.00              |                   |                   | 1.00              | 1.00              |
| Present                       |                   |                   | 1.46 (1.34-1.60)  | 1.40 (1.30-1.52)  |                   |                   | 1.58 (1.48-1.69)  | 1.52 (1.43-1.63)  |
| Household tenure              |                   |                   |                   |                   |                   |                   |                   |                   |
| Tenant                        |                   |                   | 1.00              |                   |                   |                   | 1.00              |                   |
| Owner                         |                   |                   | 1.00 (0.89-1.11)  |                   |                   |                   | 1.00 (0.91-1.08)  |                   |
| Material deprivation          |                   |                   |                   |                   |                   |                   |                   |                   |
| Absent                        |                   |                   | 1.00              | 1.00              |                   |                   | 1.00              | 1.00              |
| Present                       |                   |                   | 2.19 (2.00-2.41)  | 1.96 (1.78-2.15)  |                   |                   | 2.17 (2.01-2.35)  | 1.93 (1.79-2.08)  |
| Financial problems            |                   |                   |                   |                   |                   |                   |                   |                   |
| No                            |                   |                   | 1.00              | 1.00              |                   |                   | 1.00              | 1.00              |
| Yes                           |                   |                   | 1.57 (1.42-1.73)  | 1.50 (1.34-1.63)  |                   |                   | 1.39 (1.29-1.51)  | 1.33 (1.23-1.43)  |
| Quality of public services    |                   |                   |                   |                   |                   |                   |                   |                   |
| Good                          |                   |                   | 1.00              | 1.00              |                   |                   | 1.00              | 1.00              |
| Poor                          |                   |                   | 1.54 (1.40-1.70)  | 1.39 (1.27-1.53)  |                   |                   | 1.64 (1.51-1.77)  | 1.51 (1.40-1.63)  |
|                               |                   |                   |                   |                   |                   |                   |                   |                   |
| <b>Random effects</b>         |                   |                   |                   |                   |                   |                   |                   |                   |
| Country level                 |                   |                   |                   |                   |                   |                   |                   |                   |
| Between country variance (SE) | 0.1767 (0.05066)  | 0.1265 (0.03799)  | 0.08360 (0.02876) | 0.07835 (0.02697) | 0.1711 (0.04749)  | 0.1258 (0.03594)  | 0.08378 (0.02609) | 0.07317 (0.02314) |
| MOR                           | 1.50              | 1.40              | 1.32              | 1.31              | 1.48              | 1.40              | 1.32              | 1.30              |
| Region level                  |                   |                   |                   |                   |                   |                   |                   |                   |
| Between region variance (SE)  | 0.07319 (0.01670) | 0.06726 (0.01644) | 0.08601 (0.02034) | 0.08965 (0.02038) | 0.07009 (0.01378) | 0.05600 (0.01303) | 0.05915 (0.01401) | 0.05245 (0.01312) |

\*Model 2 and 3 have been adjusted for socio-demographic factors of model 1

## DISCUSSION

This is one of the first studies to examine PMH in a large Europe wide sample and to our knowledge the first to report on a wide range of determinants. We grouped the determinants that have individually been reported in the literature with regard to mental health. Our study found a broad range of risk factors for poor PMH and our results are mainly in line with previous research that showed similar associations in single countries or single correlates, not controlling for other factors. However, most studies so far have looked at mental illness and not at PMH. Other studies covering ~~more~~ positive aspects of mental health used single questions about happiness or life satisfaction. This approach is not the same as the concept of PMH, since it only covers the hedonistic perspective of wellbeing, in the sense of feeling happy.[31]

A large number of associations between socio-demographic, psychosocial, and material risk factors and PMH in citizens from 34 European countries were found in this study. Higher age, lower educational status and not working were associated with poor PMH among both genders. Of the psychosocial factors, practicing religion rarely or never, low social support, low levels of trust, and high social exclusion were associated with poor PMH among both genders. Living alone was associated with PMH in both genders. Not having children had a protective effect against poor positive mental health for women but not for men. All material determinants were associated with poor PMH among men and women.

Our results are in line with previous studies reporting that low educational level,[14, 32-34] and not working,[14, 33] are associated with poor mental wellbeing. The results on age and indicators of mental wellbeing are controversial, some studies reporting that older age groups are at higher risk for poor mental wellbeing,[14, 16, 32, 35] which would be in accordance with our results, others finding the opposite.[36-38] Associations between living area and mental wellbeing have been reported, however the direction of this relationship is not clear: living in a rural area [14] and living in a large city [16] have been associated with poor PMH. When classifying living area in two categories - urban or rural - we did not find a significant association between living area and PMH. Living alone,[16, 33, 35] low social support,[13, 14, 16, 34, 39] loneliness,[14] and exclusion [40] have been associated with poor positive mental or emotional health and a study in Russia found associations between high levels of trust and high emotional health.[40] We found that not or rarely attending religious services was associated with poor PMH. A previous study reported that frequency of prayer is associated with mental wellbeing.[38] There are some studies investigating the associations of material factors and mental illness. Poor economic condition [16] and neighbourhood problems [15, 39] have been associated with poor mental wellbeing or PMH before. However, research on the effect of other material factors on PMH is lacking.

1  
2  
3 In the intermediate models 1-3 age, social exclusion and material deprivation showed the strongest  
4 association with poor PMH among men and women. These three factors also appeared to have the  
5 strongest association with poor PMH in our final model (model 4), examining the effect of all  
6 determinants together. Particularly, all material factors were significantly associated with poor PMH  
7 in the separate as well as in the complete model, taking further socio-demographic and psychosocial  
8 factors into account. This group of determinants has not been studied extensively yet in the context  
9 of PMH but rather with regard to self-rated health [21, 22] or mental illness.[41] The fact that these  
10 factors stayed significant throughout all models is in agreement with the believe that material factors  
11 may have a direct (through biological pathways) or indirect effect (through e.g. behavioural factors)  
12 on health outcomes.[22] We might not have found a significant association of household tenure and  
13 PMH because there are cultural differences between countries in the approaches of buying a house  
14 or living for rent. Hence household tenure might not be an indicator for material prosperity in all  
15 countries.

16  
17 One of the limitations of this study is its cross-sectional nature. When interpreting the relationship  
18 between the determinants, it needs to be kept in mind that no causal interpretation is possible. The  
19 response rate of 41% in the third round of the EQLS was lower than aspired and differed across  
20 countries.[18] It has been argued that non-participants may be more likely to belong to low social  
21 groups and to have poorer health outcomes.[42] This would be a selection bias and the prevalence of  
22 poor PMH as well as the association between some determinants, especially material determinants,  
23 might be underestimated. This study did not take into account (mediating) behavioural factors (e.g.  
24 physical activity), which may play a role in the association with PMH. Physical activity has a positive  
25 effect on PMH [43] and it could be hypothesized that living in areas with high neighbourhood  
26 problems might hinder leisure time-physical activity, hence physical activity could be a mediating  
27 factor in the association between material factors and PMH. For future studies it would be highly  
28 desirable to also include behavioural factors. Although the WHO-5 is a validated and relatively short  
29 measure of PMH in population surveys, there are more comprehensive measures to assess this  
30 complex construct, which should be used in future studies. Moreover, in this study the cut-off point  
31 for poor PMH has been set at the 25% percentile to look at people that have low levels of PMH.  
32 Using medians or quartiles as cut-off point when no official cut-off points are available is common  
33 practice. However, a standardized cut-off point for the WHO-5 would be desirable. The study of PMH  
34 is relatively young and there is still discussion on a common definition of PMH and different  
35 measurements exist. It will take some years to achieve agreement on the appropriate measurement  
36 and definition of PMH.[10] In this context it would be highly desirable to also test if instruments are  
37 gender sensitive. This study, on the other hand has many strengths. The large dataset with  
38 comparable data across Europe, allowed us to study each gender separately and comparability of  
39  
40  
41  
42  
43  
44  
45  
46  
47  
48  
49  
50  
51  
52  
53  
54  
55  
56  
57  
58  
59  
60

1  
2  
3 data between 34 European countries enabled us to give an overall view of determinants of PMH  
4 among people in Europe. It used the WHO-5 as a validated measure for PMH and has analysed a  
5 broad picture of potential risk factors.  
6  
7

### 8 9 **Conclusion**

10 This study showed independent associations between various socio-demographic, psychosocial, and  
11 material determinants and PMH. Our study provides a first overview of the distribution of  
12 determinants and their association with PMH in Europe. Thereby it can be used as a first basis for  
13 confirmatory and more specific analysis on determinants of poor PMH as well as for the  
14 development of preventive programs or policies in this context.  
15  
16  
17  
18  
19

20  
21 **Acknowledgements** The authors gratefully acknowledge the European Foundation for the  
22 Improvement of Living and Working Conditions as the original data creators and the UK Data Archive.  
23 The European Foundation for the Improvement of Living and Working Conditions and the UK Data  
24 Archive bear no responsibility for the data analysis or interpretation.  
25

26 **Competing interests** None

27 **Funding** None  
28  
29  
30  
31  
32  
33  
34  
35  
36  
37  
38  
39  
40  
41  
42  
43  
44  
45  
46  
47  
48  
49  
50  
51  
52  
53  
54  
55  
56  
57  
58  
59  
60

## References

- 1 WHO. Strengthening mental health promotion. *Fact sheet no 220*. Geneva 2001.
- 2 Huppert FA, Whittington JE. Evidence for the independence of positive and negative well-being: Implications for quality of life assessment. *Br J Health Psychol* 2003;**8**:107-22.
- 3 Keyes CL. The mental health continuum: from languishing to flourishing in life. *J Health Soc Behav* 2002;**43**:207-22.
- 4 Keyes CLM. Mental illness and/or mental health? Investigating axioms of the complete state model of health. *J Consult Clin Psychol* 2005;**73**:539-48.
- 5 Hu Y, Stewart-Brown S, Twigg L, et al. Can the 12-item General Health Questionnaire be used to measure positive mental health? *Psychol Med* 2007;**37**:1005-13.
- 6 Ryff CD, Love GD, Urry HL, et al. Psychological well-being and ill-being: Do they have distinct or mirrored biological correlates? *Psychother Psychosom* 2006;**75**:85-95.
- 7 Wood AM, Joseph S. The absence of positive psychological (eudemonic) well-being as a risk factor for depression: a ten year cohort study. *J Affect Disord* 2010;**122**:213-7.
- 8 Keyes CL, Dhingra SS, Simoes EJ. Change in level of positive mental health as a predictor of future risk of mental illness. *Am J Public Health* 2010;**100**:2366-71.
- 9 Keyes CL, Simoes EJ. To flourish or not: positive mental health and all-cause mortality. *Am J Public Health* 2012;**102**:2164-72.
- 10 Huppert FA, So TT. Flourishing Across Europe: Application of a New Conceptual Framework for Defining Well-Being. *Soc Indic Res* 2013;**110**:837-61.
- 11 Ryan RM, Deci EL. On happiness and human potentials: a review of research on hedonic and eudaimonic well-being. *Annu Rev Psychol* 2001;**52**:141-66.
- 12 Tennant R, Hiller L, Fishwick R, et al. The Warwick-Edinburgh Mental Well-being Scale (WEMWBS): development and UK validation. *Health and Quality of Life Outcomes* 2007;**5**:63.
- 13 Bull T. Work life and mental well-being: single and coupled employed mothers in Southern Europe and Scandinavia. *Glob Health Promot* 2009;**16**:6-16.

- 1  
2  
3 14 Van Lente E, Barry MM, Molcho M, et al. Measuring population mental health and social  
4 well-being. *Int J Public Health* 2012;**57**:421-30.  
5  
6  
7 15 Guite HF, Clark C, Ackrill G. The impact of the physical and urban environment on mental  
8 well-being. *Public Health* 2006;**120**:1117-26.  
9  
10  
11 16 Lehtinen V, Sohlman B, Kovess-Masfety V. Level of positive mental health in the European  
12 Union: Results from the Eurobarometer 2002 survey. *Clin Pract Epidemiol Ment Health* 2005;**1**:9.  
13  
14 17 Eurofound. Quality of life in Europe: Subjective well-being. In: Union POotE, ed. Luxembourg  
15 2013.  
16  
17 18 Eurofound. Third European Quality of Life Survey - Quality of life in Europe: Impacts of the  
18 crisis. *Publications Office of the European Union*. Luxembourg 2012.  
19  
20 19 World Health Organization Regional Office Europe. Well-being measures in primary health  
21 care: The Depcare project. Report on a WHO Meeting. Stockholm 1998.  
22  
23 20 Bech P, Olsen LR, Kjoller M, et al. Measuring well-being rather than the absence of distress  
24 symptoms: A comparison of the SF-36 mental health subscale and the WHO-Five well-being scale. *Int*  
25 *J Methods Psychiatr Res* 2003;**12**:85-91.  
26  
27 21 Niedhammer I, Kerrad S, Schutte S, et al. Material, psychosocial and behavioural factors  
28 associated with self-reported health in the Republic of Ireland: cross-sectional results from the SLAN  
29 survey. *BMJ Open* 2013;**3**.  
30  
31 22 Schutte S, Chastang JF, Parent-Thirion A, et al. Association between socio-demographic,  
32 psychosocial, material and occupational factors and self-reported health among workers in Europe. *J*  
33 *Public Health (Oxf)* 2013; **Published Online First: 23 May 2013**.doi: 10.1093/pubmed/fdt050.  
34  
35 23 Aldabe B, Anderson R, Lyly-Yrjanainen M, et al. Contribution of material, occupational, and  
36 psychosocial factors in the explanation of social inequalities in health in 28 countries in Europe. *J*  
37 *Epidemiol Community Health* 2011;**65**:1123-31.  
38  
39  
40  
41  
42  
43  
44  
45  
46  
47  
48  
49  
50  
51  
52  
53  
54  
55  
56  
57  
58  
59  
60



- 1  
2  
3 24 Springer KW, Mager Stellman J, Jordan-Young RM. Beyond a catalogue of differences: a  
4 theoretical frame and good practice guidelines for researching sex/gender in human health. *Soc Sci*  
5 *Med* 2012;**74**:1817-24.  
6  
7  
8  
9 25 Blakely T, Subramanian SV. Multilevel Studies. In: Oakes JM, Kaufman JS, eds. *Methods in*  
10 *Social Epidemiology*. San Francisco: Jossey-Bass 2006:316-40.  
11  
12  
13 26 Merlo J, Chaix B, Ohlsson H, et al. A brief conceptual tutorial of multilevel analysis in social  
14 epidemiology: using measures of clustering in multilevel logistic regression to investigate contextual  
15 phenomena. *J Epidemiol Community Health* 2006;**60**:290-7.  
16  
17  
18  
19 27 Larsen K, Merlo J. Appropriate assessment of neighborhood effects on individual health:  
20 integrating random and fixed effects in multilevel logistic regression. *Am J Epidemiol* 2005;**161**:81-8.  
21  
22  
23 28 Katz MH. *Multilevel Analysis. A Practical Guide for Clinicians and Public Health Researchers*:  
24 Cambridge University Press 2011.  
25  
26  
27  
28 29 Davoren MP, Fitzgerald E, Shiely F, et al. Positive mental health and well-being among a third  
29 level student population. *PLoS One* 2013;**8**:e74921.  
30  
31  
32 30 Winship C, Radbill L. Sampling Weights and Regression-Analysis. *Sociological Methods &*  
33 *Research* 1994;**23**:230-57.  
34  
35  
36 31 Waterman AS. Two conceptions of happiness: Contrasts of personal expressiveness  
37 (eudaimonia) and hedonic enjoyment. *J Pers Soc Psychol* 1993; **64**:678-91  
38  
39 32 Lluch-Canut T, Puig-Llobet M, Sanchez-Ortega A, et al. Assessing positive mental health in  
40 people with chronic physical health problems: correlations with socio-demographic variables and  
41 physical health status. *BMC Public Health* 2013;**13**:928.  
42  
43  
44 33 Cable N, Bartley M, Chandola T, et al. Friends are equally important to men and women, but  
45 family matters more for men's well-being. *J Epidemiol Community Health* 2013;**67**:166-71.  
46  
47  
48 34 Hapke U, von der Lippe E, Busch M, et al. Psychische Gesundheit bei Erwachsenen in  
49 Deutschland. *Daten und Fakten: Ergebnisse der Studie "Gesundheit in Deutschland aktuell 2010"*:  
50 Robert Koch-Institut 2012.  
51  
52  
53  
54  
55  
56  
57  
58  
59  
60

- 1  
2  
3 35 Dear K, Henderson S, Korten A. Well-being in Australia--findings from the National Survey of  
4  
5 Mental Health and Well-being. *Soc Psychiatry Psychiatr Epidemiol* 2002;**37**:503-9.  
6  
7 36 Keyes CLM, Westerhof GJ. Chronological and subjective age differences in flourishing mental  
8  
9 health and major depressive episode. *Aging Ment Health* 2012;**16**:67-74.  
10  
11 37 Esteban MM, Puerto M, Fernandez Cordero X, et al. Determinants of poor mental health in  
12  
13 people aged 16 to 64 residing in a large city. *An Sist Sanit Navar* 2012;**35**:229-40.  
14  
15 38 Meisenhelder JB, Chandler EN. Prayer and health outcomes in church lay leaders. *West J Nurs*  
16  
17 *Res* 2000;**22**:706-16.  
18  
19 39 Gale CR, Dennison EM, Cooper C, et al. Neighbourhood environment and positive mental  
20  
21 health in older people: the Hertfordshire Cohort Study. *Health Place* 2011;**17**:867-74.  
22  
23 40 Rose R. How much does social capital add to individual health? A survey study of Russians.  
24  
25 *Soc Sci Med* 2000;**51**:1421-35.  
26  
27 41 McKenzie SK, Imlach Gunasekara F, Richardson K, et al. Do changes in socioeconomic factors  
28  
29 lead to changes in mental health? Findings from three waves of a population based panel study. *J*  
30  
31 *Epidemiol Community Health* 2013.  
32  
33 42 Goldberg M, Chastang JF, Leclerc A, et al. Socioeconomic, demographic, occupational, and  
34  
35 health factors associated with participation in a long-term epidemiologic survey: a prospective study  
36  
37 of the French GAZEL cohort and its target population. *Am J Epidemiol* 2001;**154**:373-84.  
38  
39 43 Malcolm E, Evans-Lacko S, Little K, et al. The impact of exercise projects to promote mental  
40  
41 wellbeing. *J Ment Health* 2013;**22**:519-27.  
42  
43  
44  
45  
46  
47  
48  
49  
50  
51  
52  
53  
54  
55  
56  
57  
58  
59  
60

## STROBE Statement—checklist of items that should be included in reports of observational studies

|                              | Item No | Recommendation                                                                                                                                                                                                                                                                                                                                                                                                                                                                                                                                                                                                                                                                                   |
|------------------------------|---------|--------------------------------------------------------------------------------------------------------------------------------------------------------------------------------------------------------------------------------------------------------------------------------------------------------------------------------------------------------------------------------------------------------------------------------------------------------------------------------------------------------------------------------------------------------------------------------------------------------------------------------------------------------------------------------------------------|
| <b>Title and abstract</b>    | 1       | (a) Indicate the study's design with a commonly used term in the title or the abstract<br>(b) Provide in the abstract an informative and balanced summary of what was done and what was found                                                                                                                                                                                                                                                                                                                                                                                                                                                                                                    |
| <b>Introduction</b>          |         |                                                                                                                                                                                                                                                                                                                                                                                                                                                                                                                                                                                                                                                                                                  |
| Background/rationale         | 2       | Explain the scientific background and rationale for the investigation being reported                                                                                                                                                                                                                                                                                                                                                                                                                                                                                                                                                                                                             |
| Objectives                   | 3       | State specific objectives, including any prespecified hypotheses                                                                                                                                                                                                                                                                                                                                                                                                                                                                                                                                                                                                                                 |
| <b>Methods</b>               |         |                                                                                                                                                                                                                                                                                                                                                                                                                                                                                                                                                                                                                                                                                                  |
| Study design                 | 4       | Present key elements of study design early in the paper                                                                                                                                                                                                                                                                                                                                                                                                                                                                                                                                                                                                                                          |
| Setting                      | 5       | Describe the setting, locations, and relevant dates, including periods of recruitment, exposure, follow-up, and data collection                                                                                                                                                                                                                                                                                                                                                                                                                                                                                                                                                                  |
| Participants                 | 6       | (a) <i>Cohort study</i> —Give the eligibility criteria, and the sources and methods of selection of participants. Describe methods of follow-up<br><i>Case-control study</i> —Give the eligibility criteria, and the sources and methods of case ascertainment and control selection. Give the rationale for the choice of cases and controls<br><i>Cross-sectional study</i> —Give the eligibility criteria, and the sources and methods of selection of participants<br>(b) <i>Cohort study</i> —For matched studies, give matching criteria and number of exposed and unexposed<br><i>Case-control study</i> —For matched studies, give matching criteria and the number of controls per case |
| Variables                    | 7       | Clearly define all outcomes, exposures, predictors, potential confounders, and effect modifiers. Give diagnostic criteria, if applicable                                                                                                                                                                                                                                                                                                                                                                                                                                                                                                                                                         |
| Data sources/<br>measurement | 8*      | For each variable of interest, give sources of data and details of methods of assessment (measurement). Describe comparability of assessment methods if there is more than one group                                                                                                                                                                                                                                                                                                                                                                                                                                                                                                             |
| Bias                         | 9       | Describe any efforts to address potential sources of bias                                                                                                                                                                                                                                                                                                                                                                                                                                                                                                                                                                                                                                        |
| Study size                   | 10      | Explain how the study size was arrived at                                                                                                                                                                                                                                                                                                                                                                                                                                                                                                                                                                                                                                                        |
| Quantitative variables       | 11      | Explain how quantitative variables were handled in the analyses. If applicable, describe which groupings were chosen and why                                                                                                                                                                                                                                                                                                                                                                                                                                                                                                                                                                     |
| Statistical methods          | 12      | (a) Describe all statistical methods, including those used to control for confounding<br>(b) Describe any methods used to examine subgroups and interactions<br>(c) Explain how missing data were addressed<br>(d) <i>Cohort study</i> —If applicable, explain how loss to follow-up was addressed<br><i>Case-control study</i> —If applicable, explain how matching of cases and controls was addressed<br><i>Cross-sectional study</i> —If applicable, describe analytical methods taking account of sampling strategy<br>(e) Describe any sensitivity analyses                                                                                                                                |

Continued on next page

**Results**

|                  |     |                                                                                                                                                                                                                                                                                                                                                                                                               |
|------------------|-----|---------------------------------------------------------------------------------------------------------------------------------------------------------------------------------------------------------------------------------------------------------------------------------------------------------------------------------------------------------------------------------------------------------------|
| Participants     | 13* | (a) Report numbers of individuals at each stage of study—eg numbers potentially eligible, examined for eligibility, confirmed eligible, included in the study, completing follow-up, and analysed<br>(b) Give reasons for non-participation at each stage<br>(c) Consider use of a flow diagram                                                                                                               |
| Descriptive data | 14* | (a) Give characteristics of study participants (eg demographic, clinical, social) and information on exposures and potential confounders<br>(b) Indicate number of participants with missing data for each variable of interest<br>(c) <i>Cohort study</i> —Summarise follow-up time (eg, average and total amount)                                                                                           |
| Outcome data     | 15* | <i>Cohort study</i> —Report numbers of outcome events or summary measures over time<br><i>Case-control study</i> —Report numbers in each exposure category, or summary measures of exposure<br><i>Cross-sectional study</i> —Report numbers of outcome events or summary measures                                                                                                                             |
| Main results     | 16  | (a) Give unadjusted estimates and, if applicable, confounder-adjusted estimates and their precision (eg, 95% confidence interval). Make clear which confounders were adjusted for and why they were included<br>(b) Report category boundaries when continuous variables were categorized<br>(c) If relevant, consider translating estimates of relative risk into absolute risk for a meaningful time period |
| Other analyses   | 17  | Report other analyses done—eg analyses of subgroups and interactions, and sensitivity analyses                                                                                                                                                                                                                                                                                                                |

**Discussion**

|                  |    |                                                                                                                                                                            |
|------------------|----|----------------------------------------------------------------------------------------------------------------------------------------------------------------------------|
| Key results      | 18 | Summarise key results with reference to study objectives                                                                                                                   |
| Limitations      | 19 | Discuss limitations of the study, taking into account sources of potential bias or imprecision. Discuss both direction and magnitude of any potential bias                 |
| Interpretation   | 20 | Give a cautious overall interpretation of results considering objectives, limitations, multiplicity of analyses, results from similar studies, and other relevant evidence |
| Generalisability | 21 | Discuss the generalisability (external validity) of the study results                                                                                                      |

**Other information**

|         |    |                                                                                                                                                               |
|---------|----|---------------------------------------------------------------------------------------------------------------------------------------------------------------|
| Funding | 22 | Give the source of funding and the role of the funders for the present study and, if applicable, for the original study on which the present article is based |
|---------|----|---------------------------------------------------------------------------------------------------------------------------------------------------------------|

\*Give information separately for cases and controls in case-control studies and, if applicable, for exposed and unexposed groups in cohort and cross-sectional studies.

**Note:** An Explanation and Elaboration article discusses each checklist item and gives methodological background and published examples of transparent reporting. The STROBE checklist is best used in conjunction with this article (freely available on the Web sites of PLoS Medicine at <http://www.plosmedicine.org/>, Annals of Internal Medicine at <http://www.annals.org/>, and Epidemiology at <http://www.epidem.com/>). Information on the STROBE Initiative is available at [www.strobe-statement.org](http://www.strobe-statement.org).
